# Supplementary material for: Atom-Economic Synthesis of 4-Pyrones from Diynones and Water
Source: Preprints.org preprint supplement (doi:10.20944/preprints201701.0037.v1), 2017-01-09
Supplement: Supplementary file 1 [file supplementary]

# Supplementary Materials: Atom-Economic Synthesis of 4-Pyrones from Diynones and Water

Yan-Li Xu, Qing-Hu Teng, Wei Tong, Heng-Shan Wang, Ying-Ming Pan and Xian-Li Ma

## 1. General Information

All manipulations were performed under an air atmosphere unless otherwise statement. Column chromatography was performed on silica gel (300–400 mesh). NMR spectra were obtained using a Bruker Avance 500 spectrometer ( $^1\text{H}$  at 500 MHz and  $^{13}\text{C}$  at 125 MHz) or NMR spectra were obtained using a Bruker Avance 400 spectrometer ( $^1\text{H}$  at 400 MHz and  $^{13}\text{C}$  at 100 MHz). IR spectra were recorded on a FT-IR spectrometer and only major peaks are reported in  $\text{cm}^{-1}$ . High resolution mass spectra (HRMS) were recorded on the Exactive Mass Spectrometer (Thermo Scientific, USA) equipped with ESI or APCI ionization source.

Materials. Unless stated otherwise, commercial reagents were used without further purification. All reagents were weighed and handled in air at room temperature. **1a–1r** were prepared by the reported methods [1,2].

## 2. Synthesis of 2

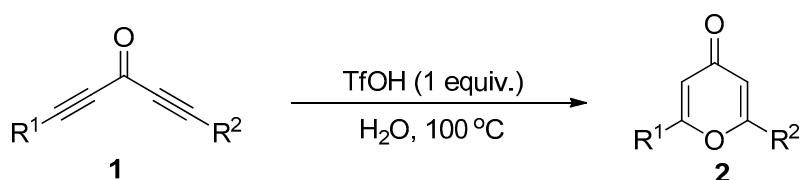

Scheme 1.

The reaction mixture of **1** (0.5 mmol), TfOH (1 equiv.) and  $\text{H}_2\text{O}$  (1 mL) in a 15 mL test tube was stirred at 100 °C for 36 h, and monitored periodically by TLC. Upon completion, the reaction mixture was diluted with water (5 mL) and extracted with ethyl acetate ( $3 \times 5$  mL). The combined organic layers were washed with water and brine, dried over  $\text{MgSO}_4$  and filtered. The solvent was removed under vacuum. The residue was purified by flash column chromatography (petroleum ether and ethyl acetate,  $v/v = 5:1$  to  $2:1$ ) to afford 4-Pyrones **2**.

## 3. Control Experiments

### 3.1. Deuterium Labeling Experiment

The reaction mixture of **1** (0.5 mmol), TfOH (1 equiv.), and  $\text{D}_2\text{O}$  (1 mL) in a 15 mL test tube was stirred at 100 °C for 36 h, and monitored periodically by TLC. Upon completion, the reaction mixture was diluted with water (5 mL) and extracted with ethyl acetate ( $3 \times 5$  mL). The combined organic layers were washed with water and brine, dried over  $\text{MgSO}_4$  and filtered. The solvent was removed under vacuum. The residue was purified by flash column chromatography (petroleum ether and ethyl acetate,  $v/v = 5:1$  to  $2:1$ ) to afford 4-Pyrone **2a-d** (80%).

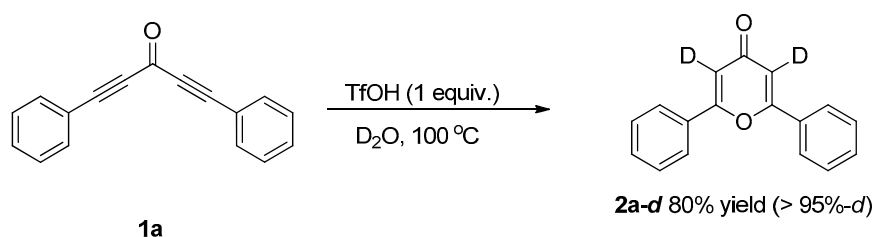

Scheme 2.

### 3.2. $O^{18}$ -Labeled Experiment

The reaction mixture of **1a** (0.5 mmol), TfOH (1 equiv.), and  $H_2O^{18}$  (1 mL) in a 15 mL test tube was stirred at 100 °C for 36 h, and monitored periodically by TLC. Upon completion, the reaction mixture was diluted with water (5 mL) and extracted with ethyl acetate ( $3 \times 5$  mL). The combined organic layers were washed with water and brine, dried over  $MgSO_4$  and filtered. The solvent was removed under vacuum. The residue was purified by flash column chromatography (petroleum ether and ethyl acetate,  $v/v = 5:1$  to  $2:1$ ) to afford 4-Pyrone **2a- $O^{18}$**  (78%).

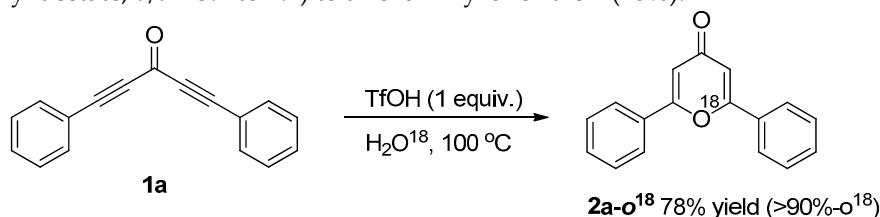

Scheme 3.

### 3.3. Gram-Scale Synthesis

The reaction mixture of **1a** (5 mmol), TfOH (1 equiv.) and  $H_2O$  (10 mL) in a 50 mL round-bottom flask was stirred at 100 °C for 36 h, and monitored periodically by TLC. Upon completion, the reaction mixture was diluted with water (30 mL) and extracted with ethyl acetate ( $3 \times 30$  mL). The combined organic layers were washed with water and brine, dried over  $MgSO_4$  and filtered. The solvent was removed under vacuum. The residue was purified by flash column chromatography (petroleum ether and ethyl acetate,  $v/v = 5:1$  to  $2:1$ ) to afford 4-Pyrones **2a** (53%).

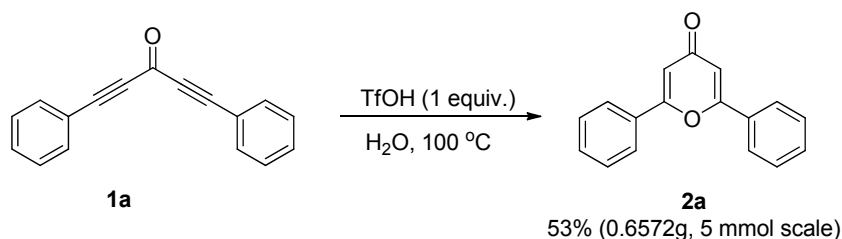

Scheme 4.

4. Copies of  $^1\text{H}$  NMR and  $^{13}\text{C}$  NMR Spectra of Products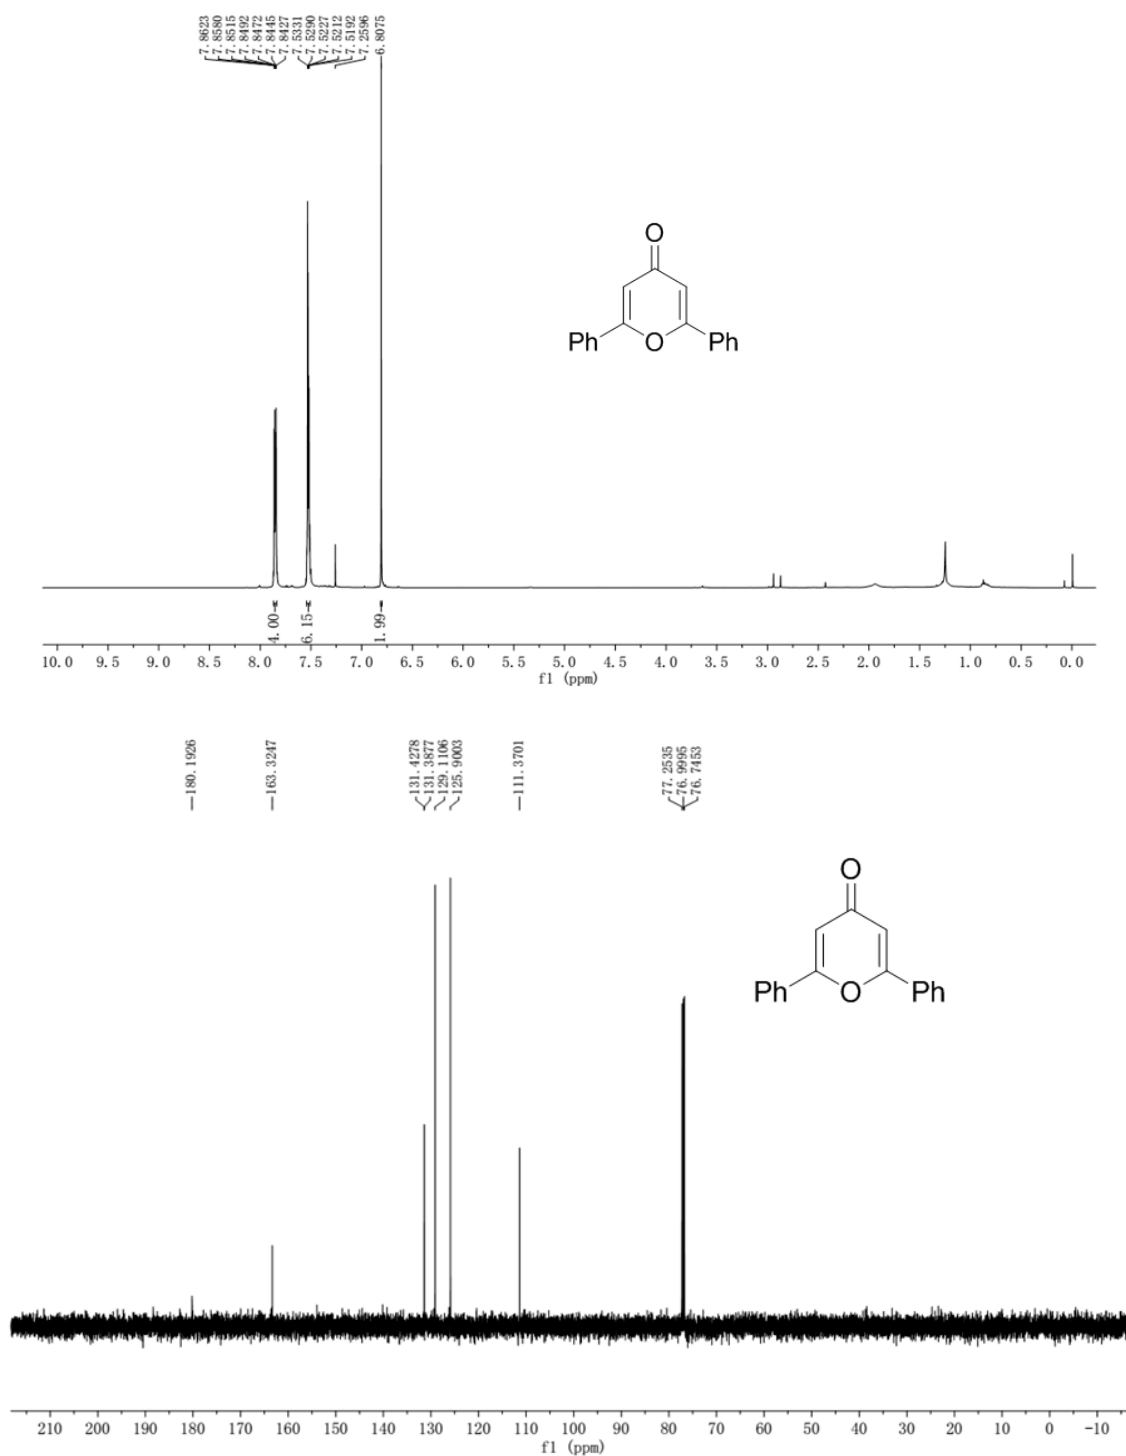

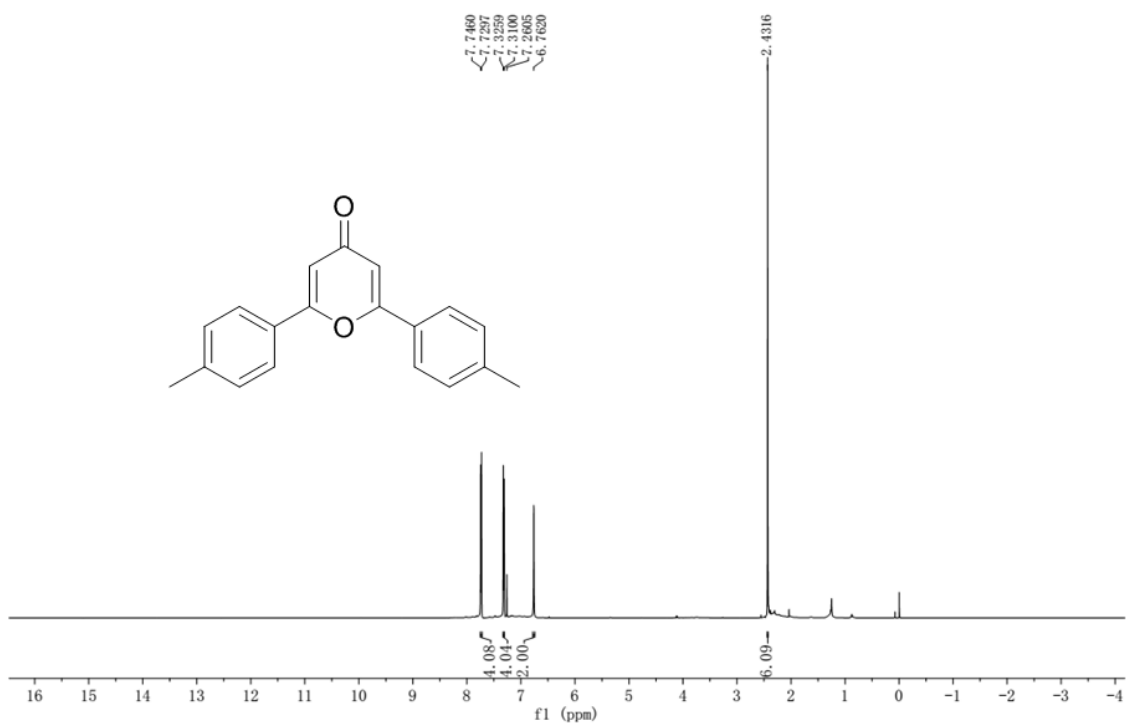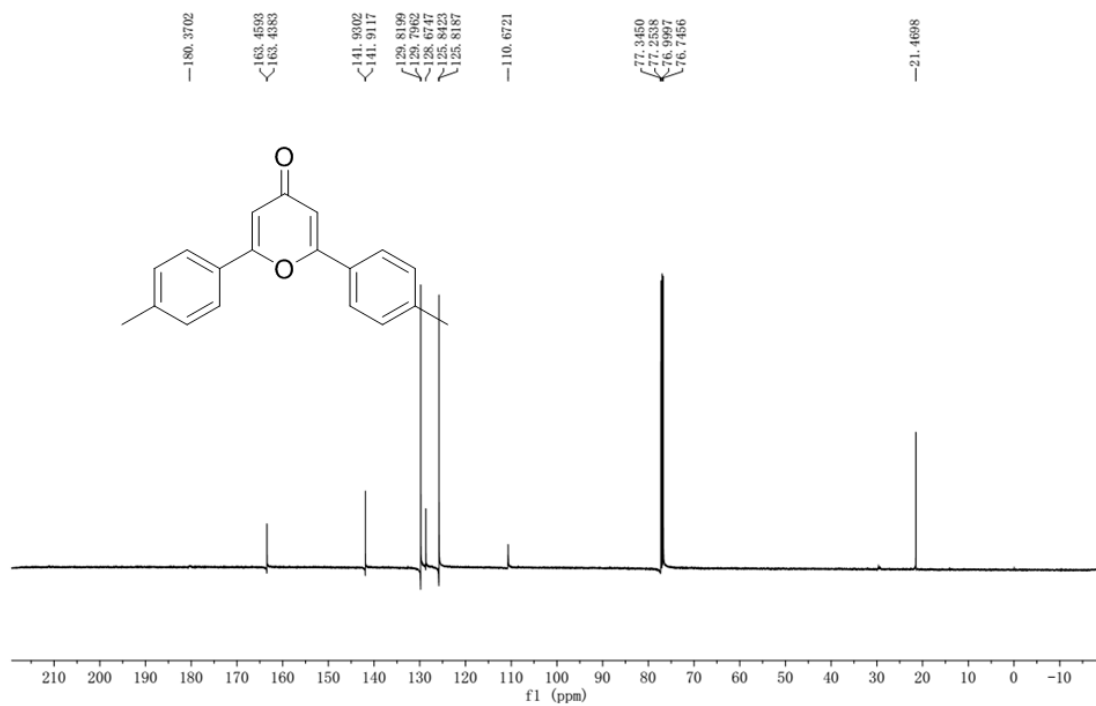

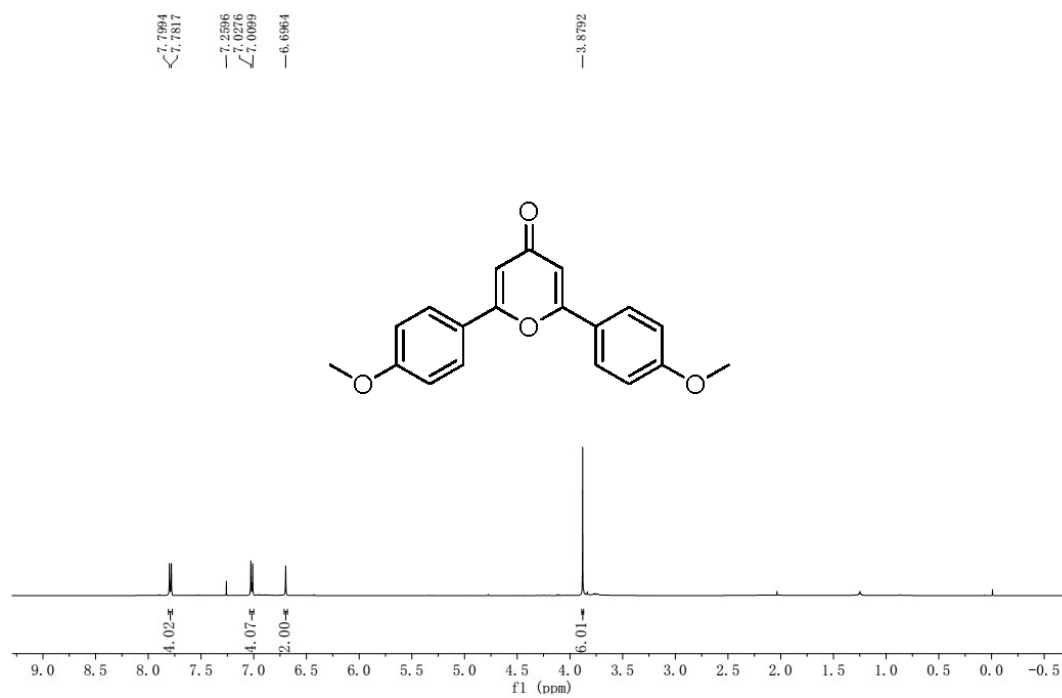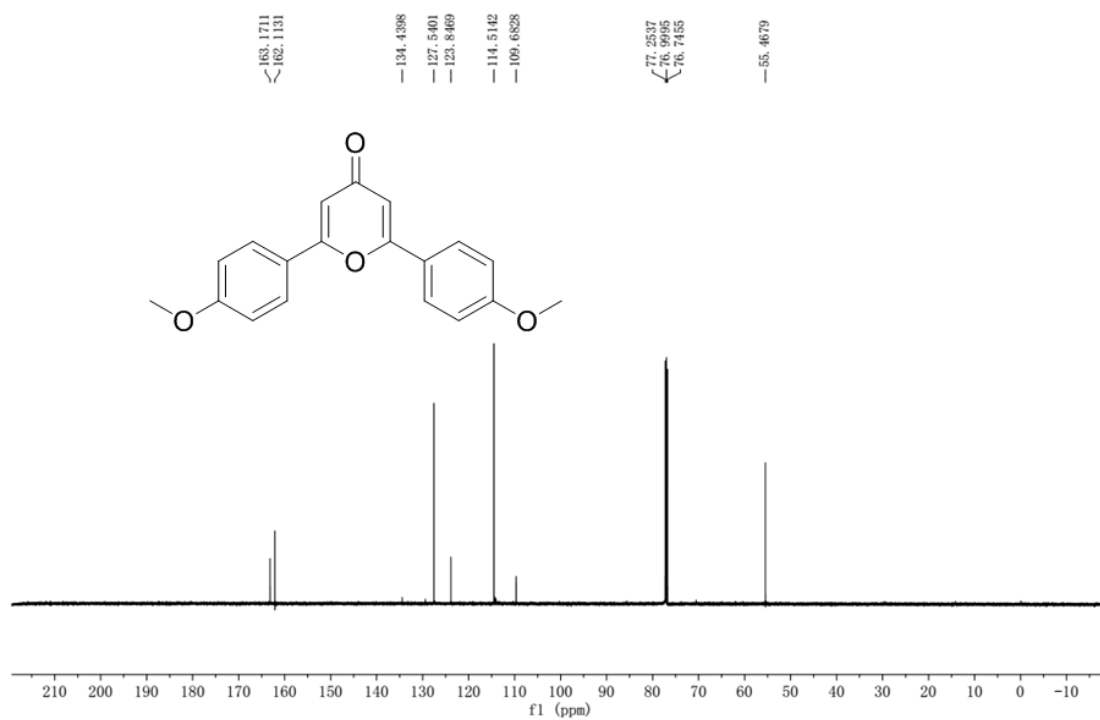

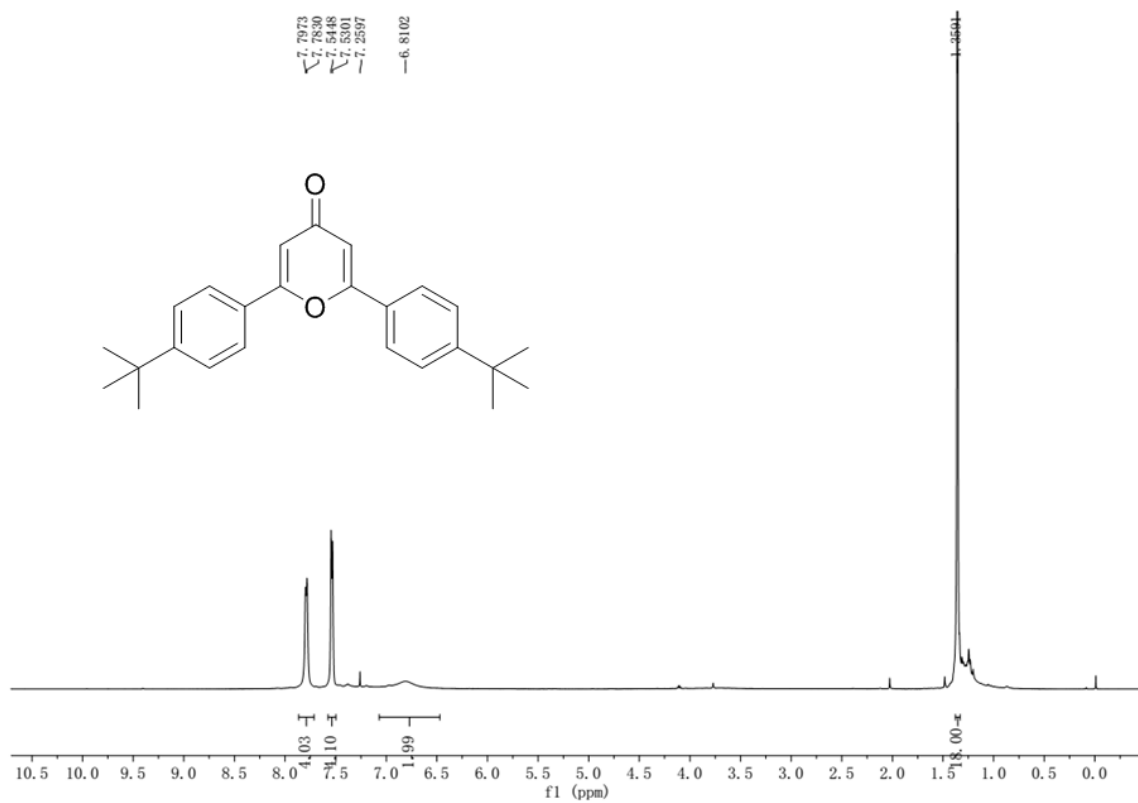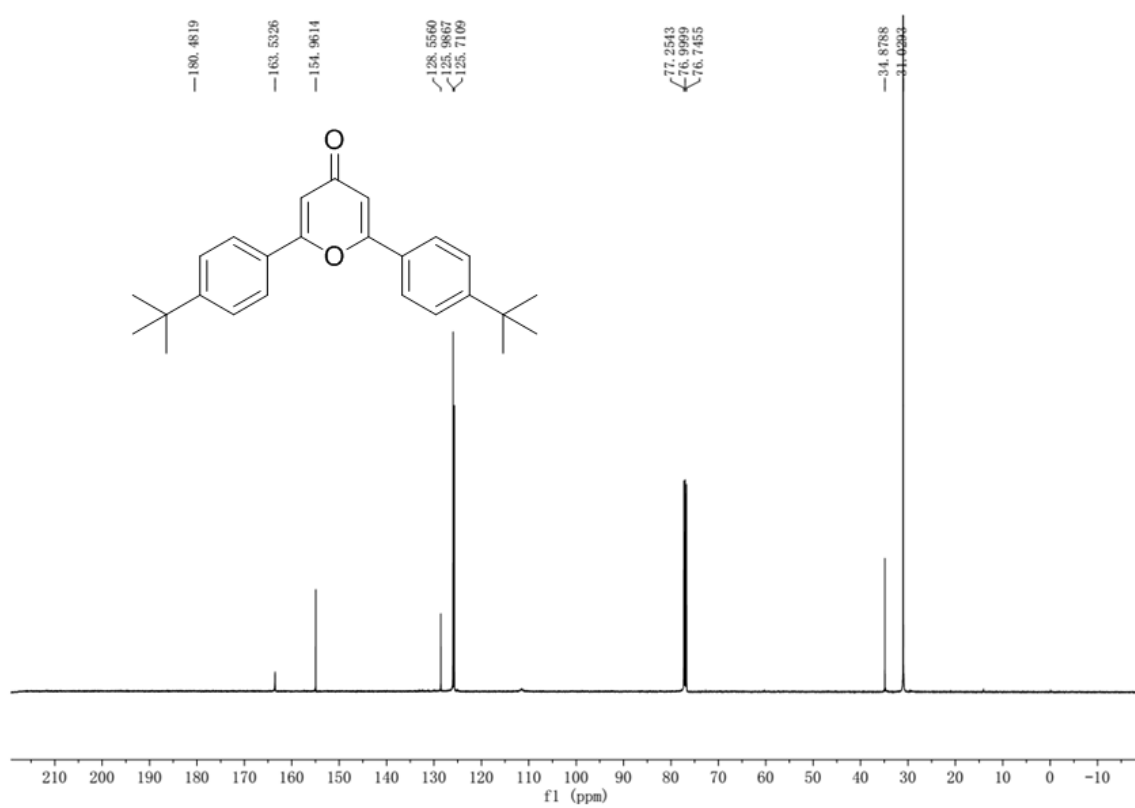

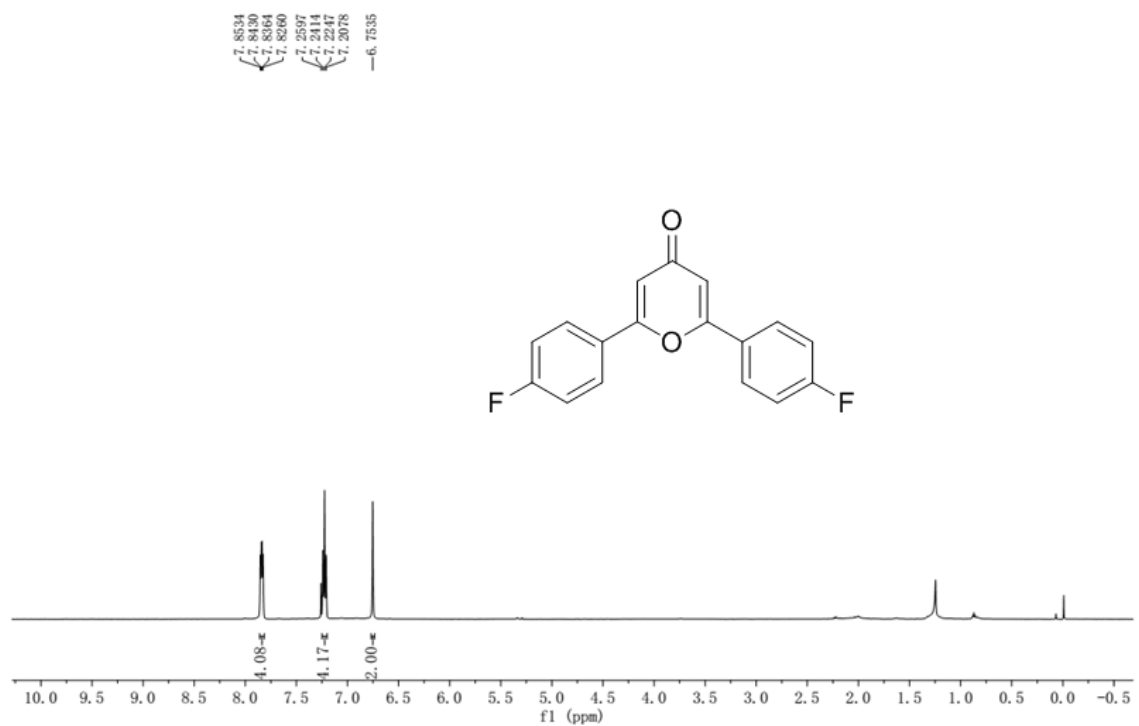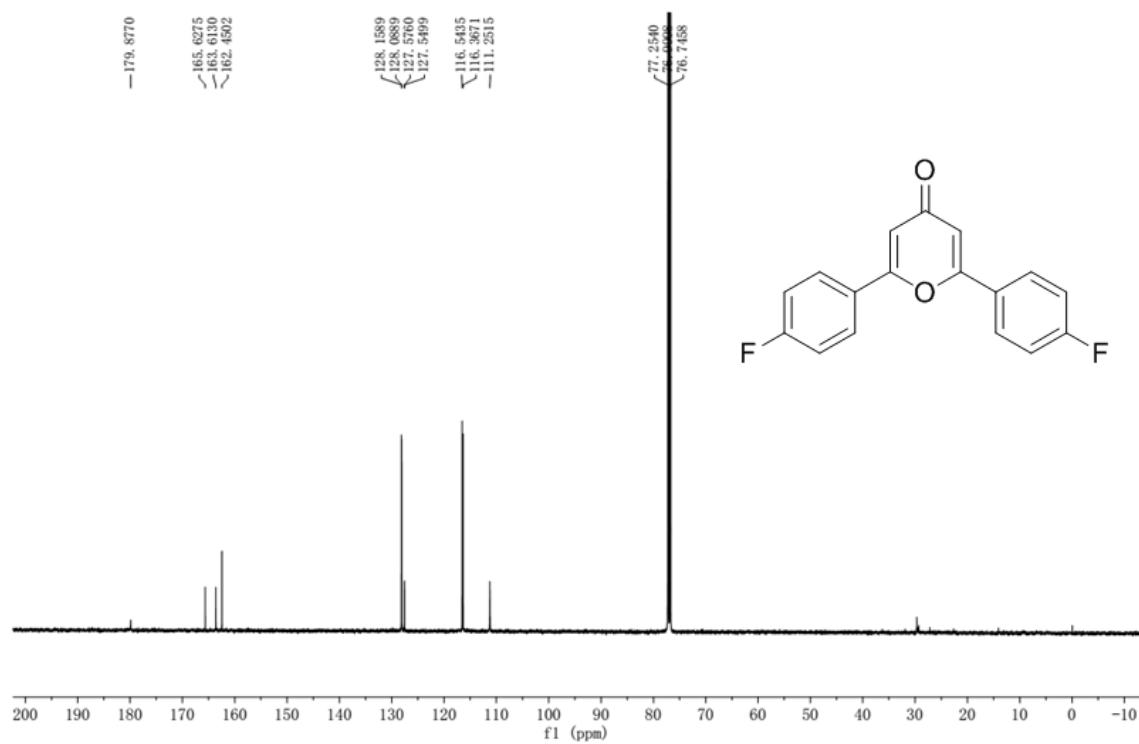

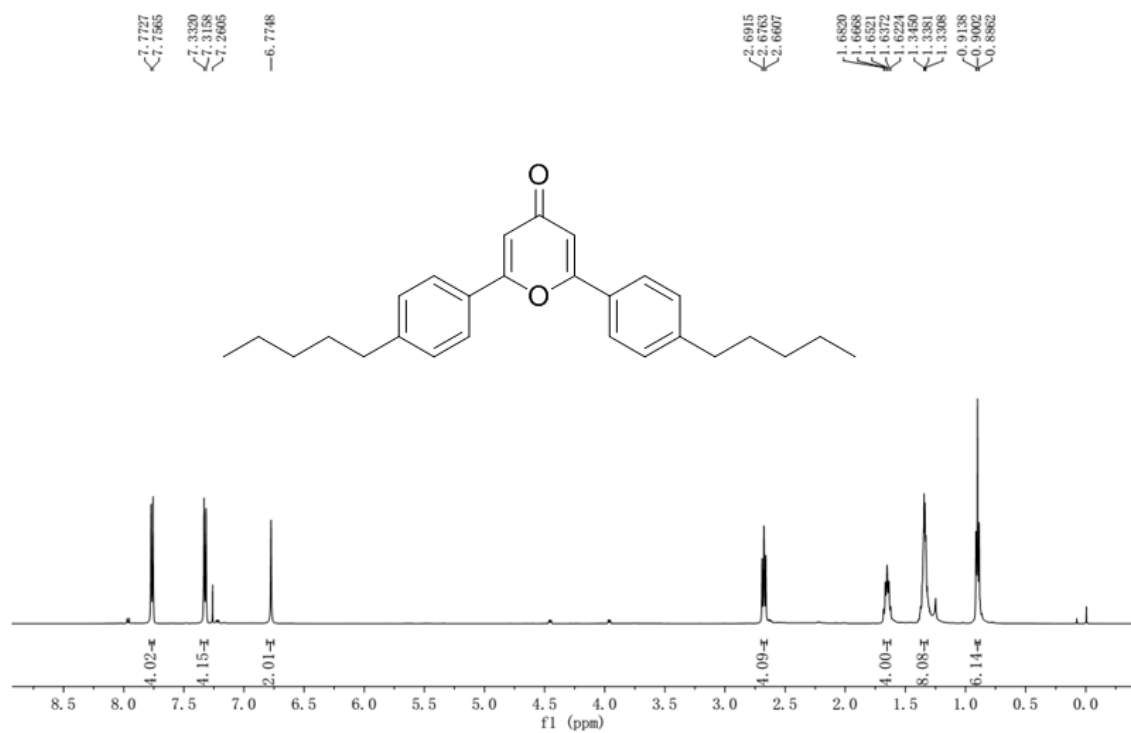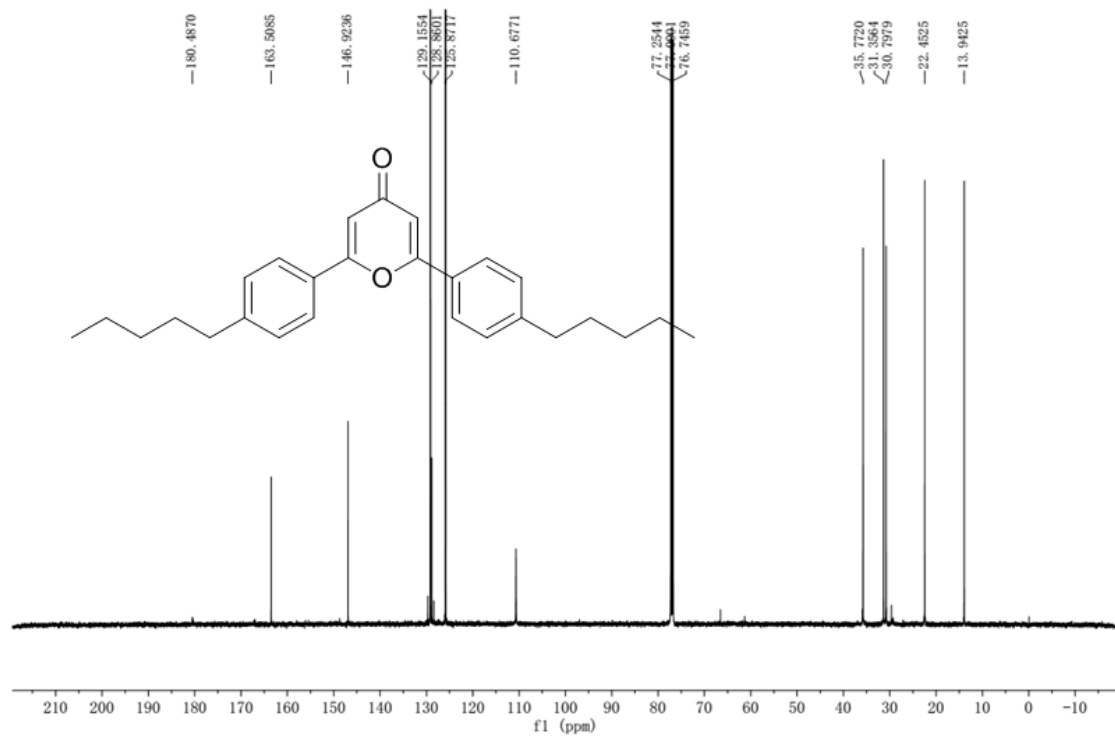



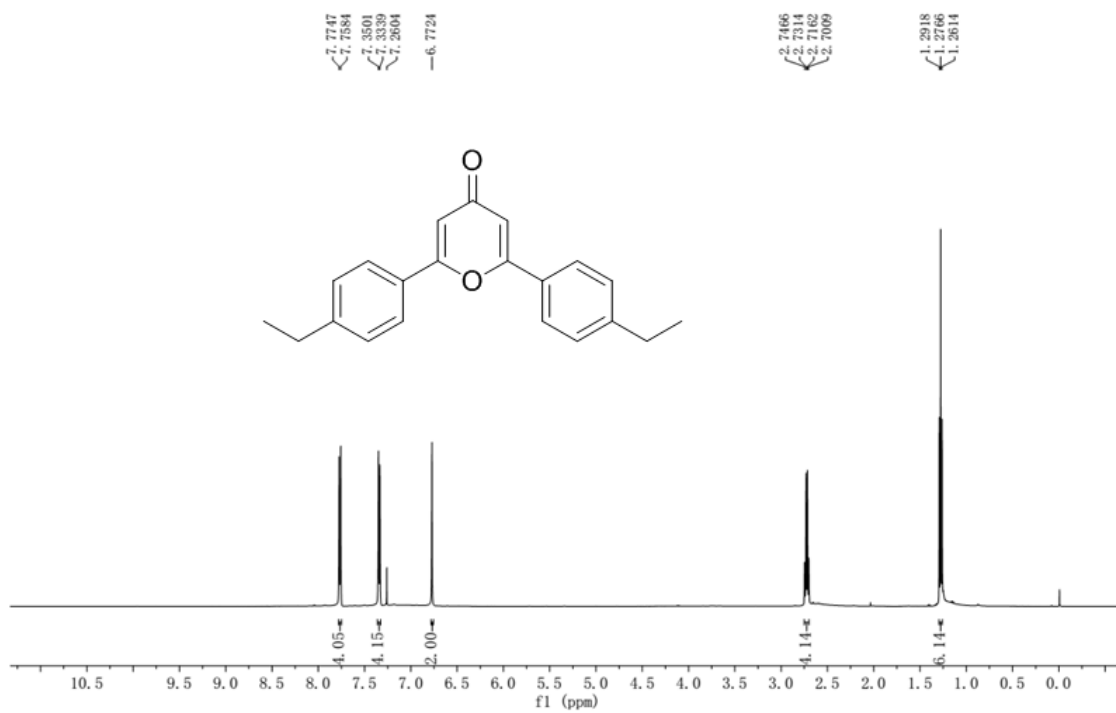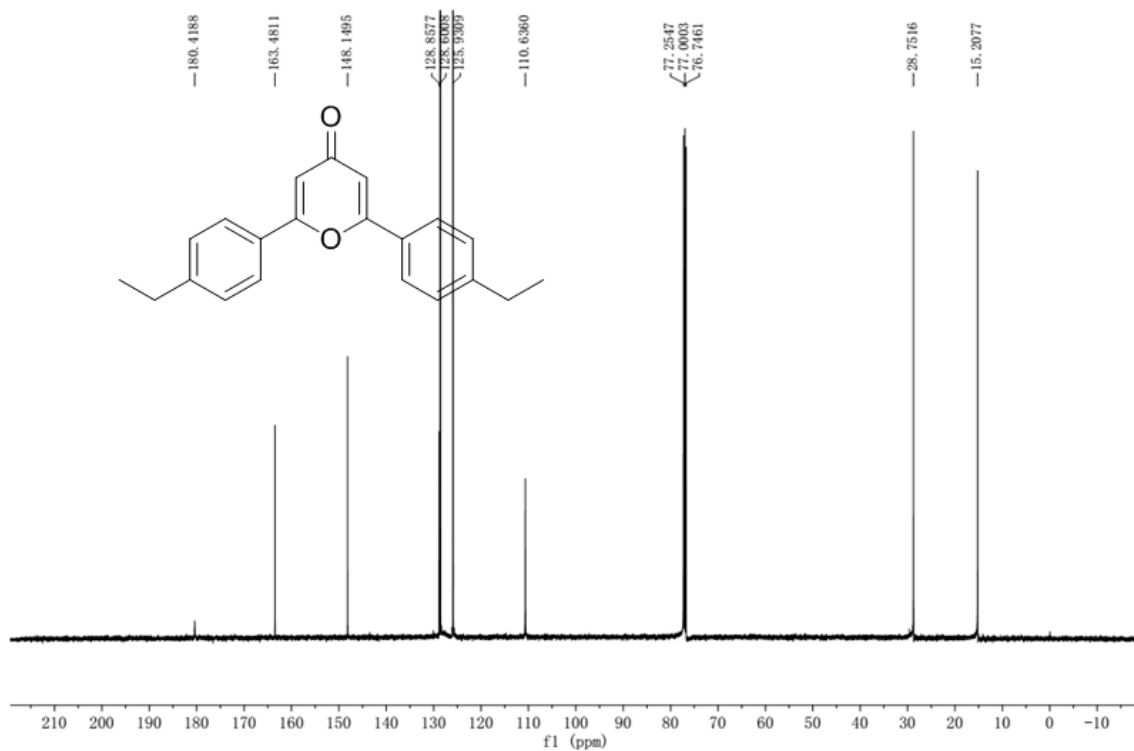

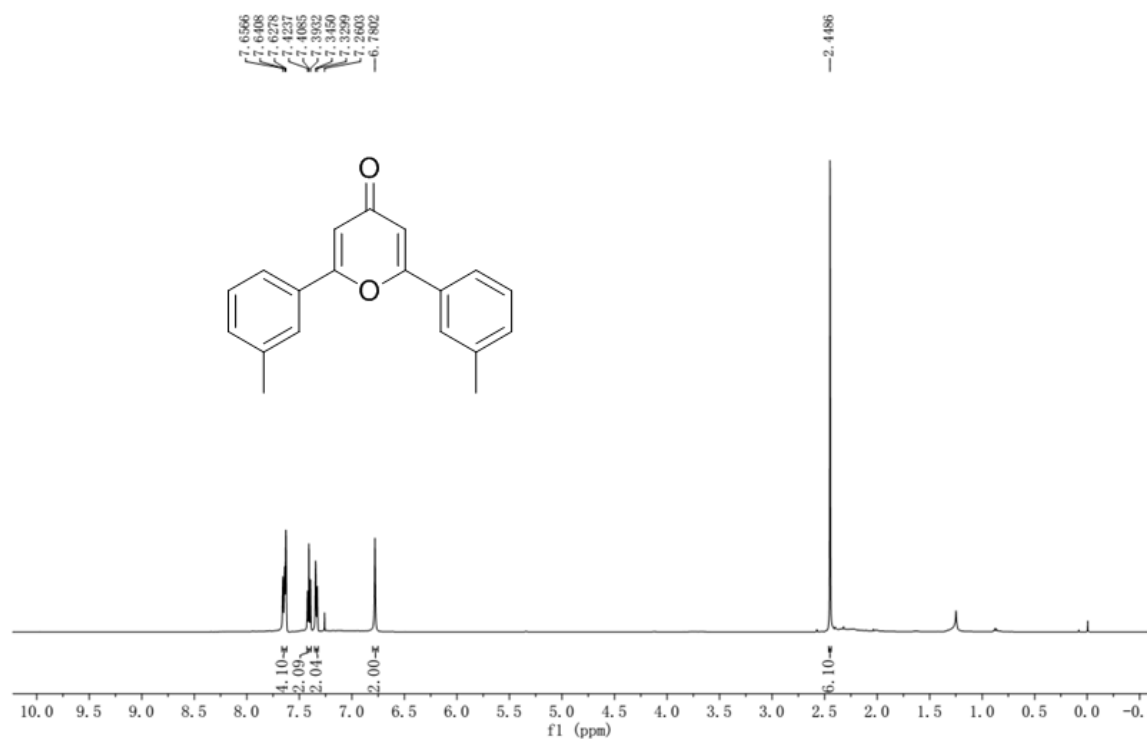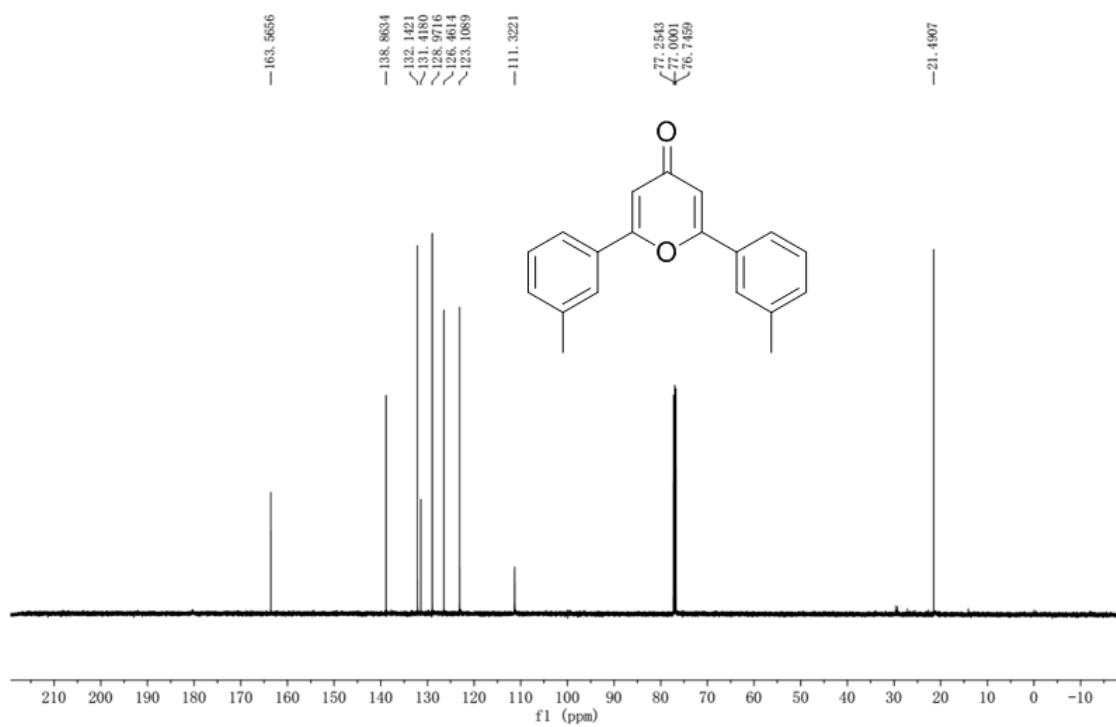

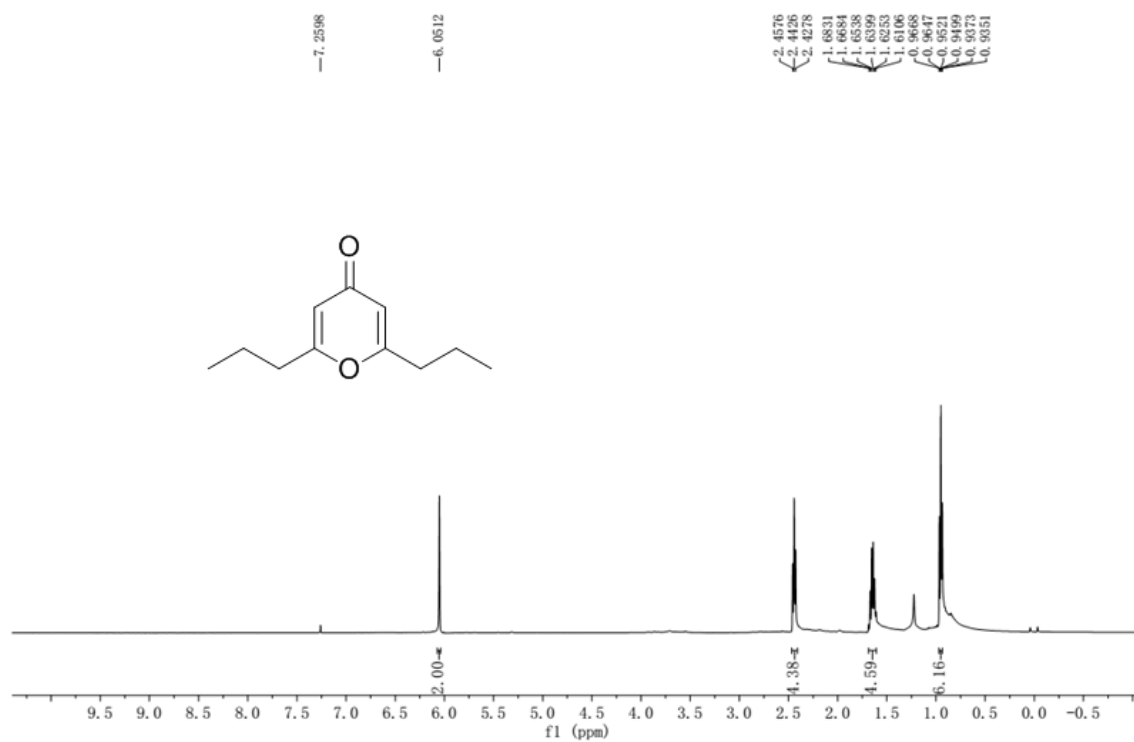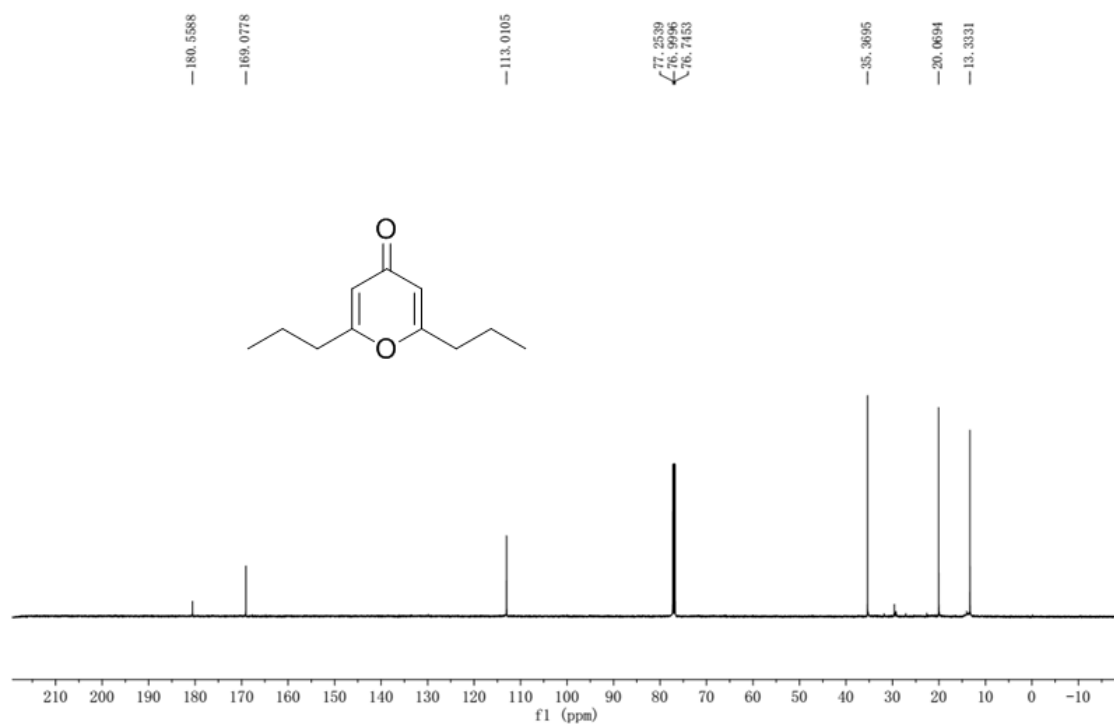

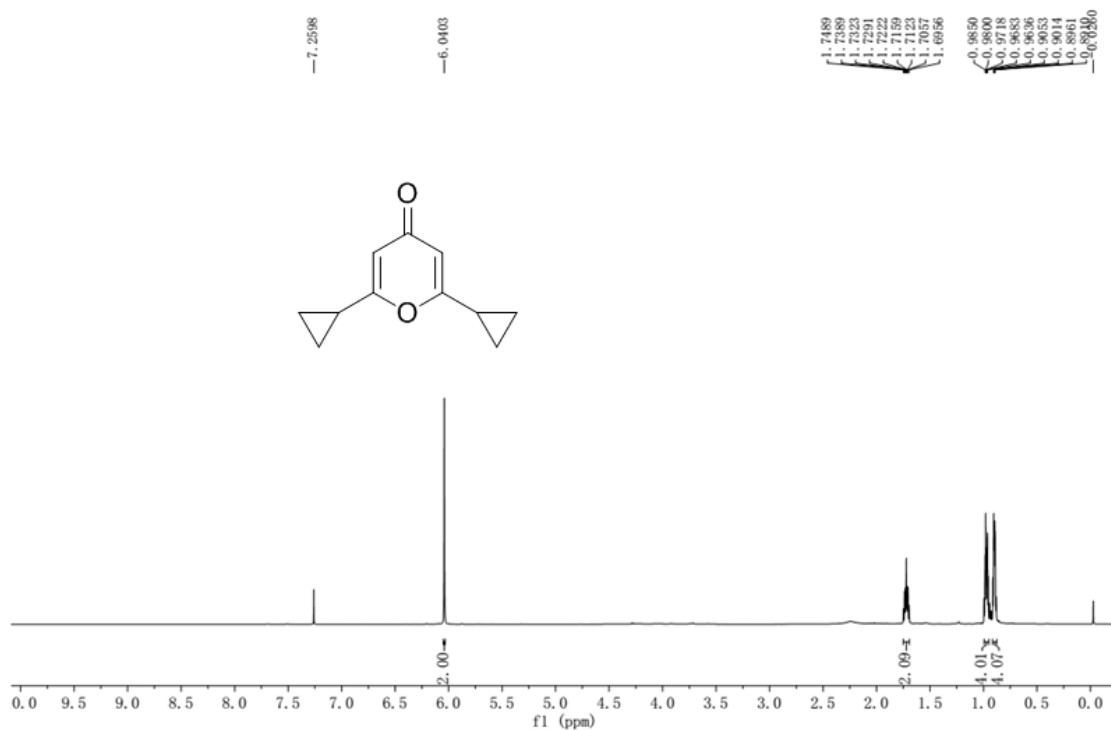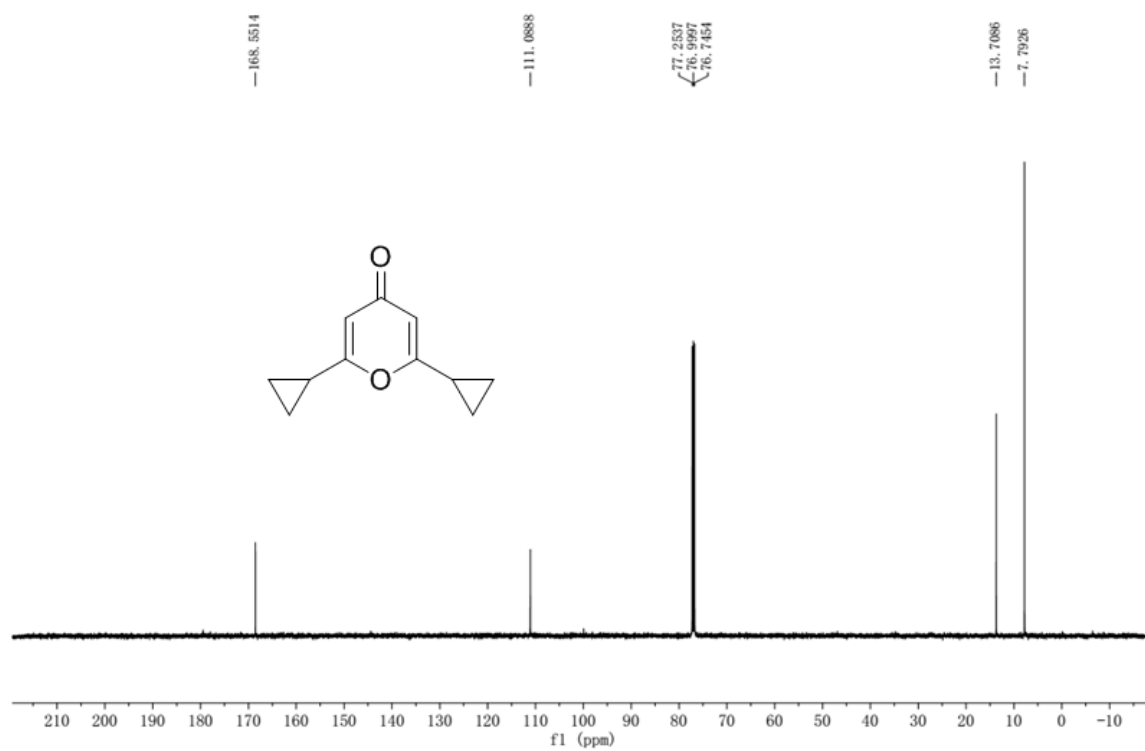

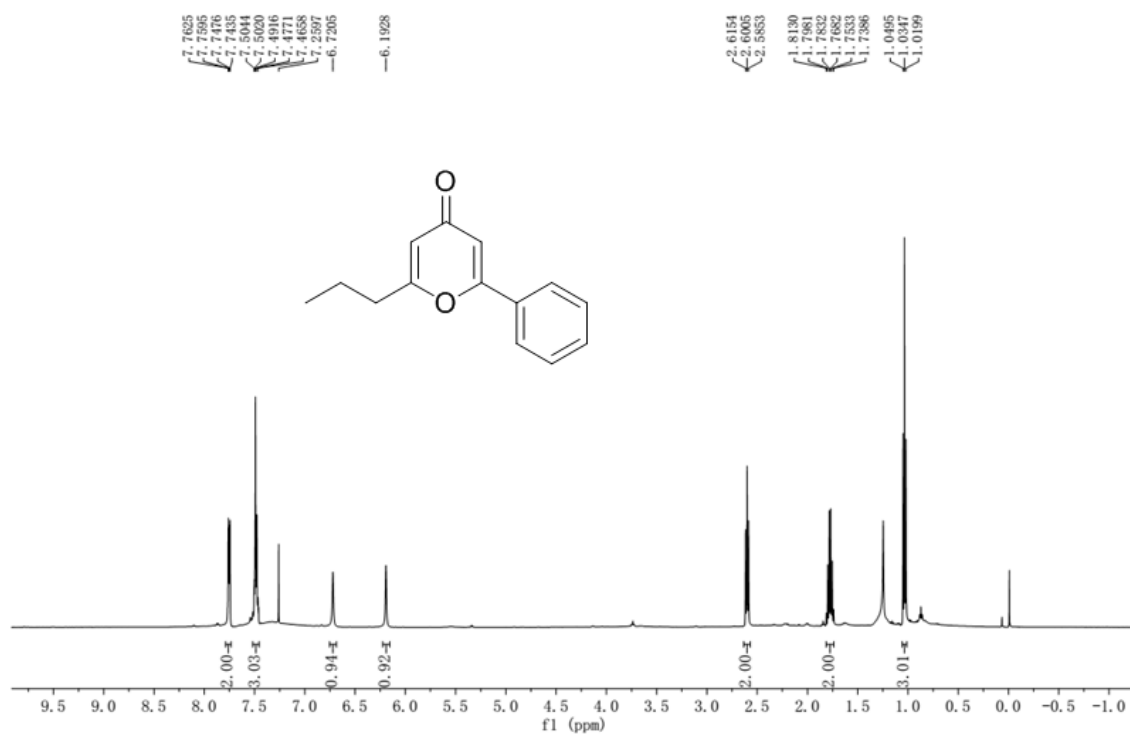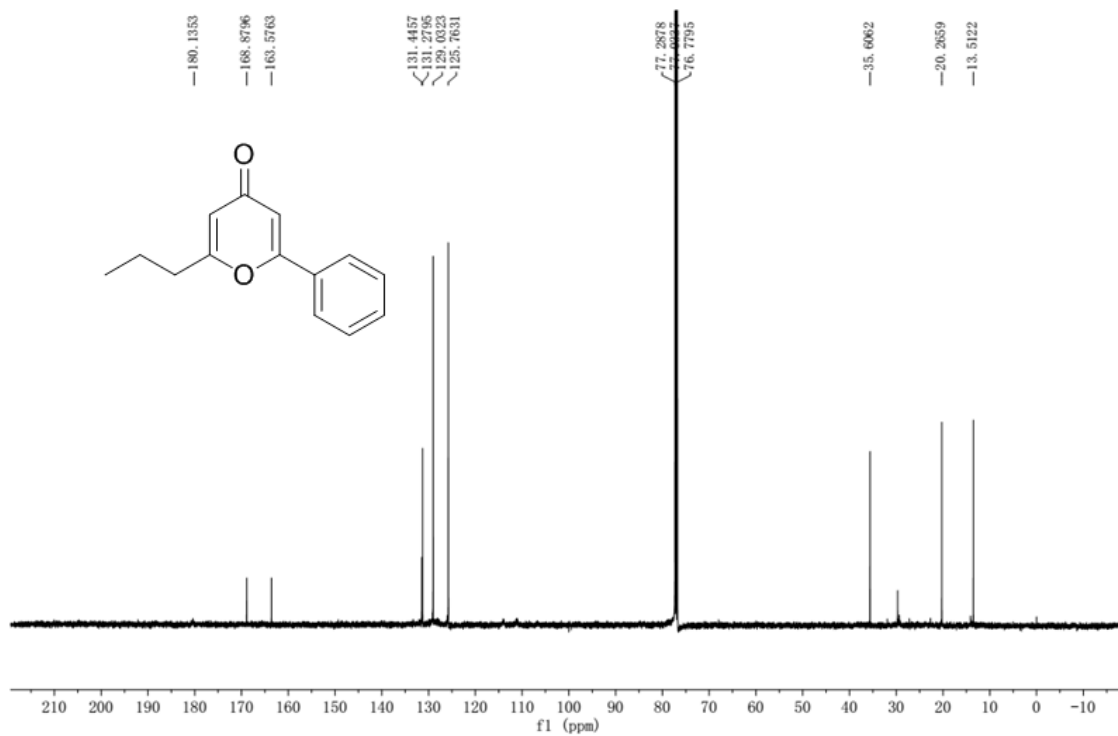

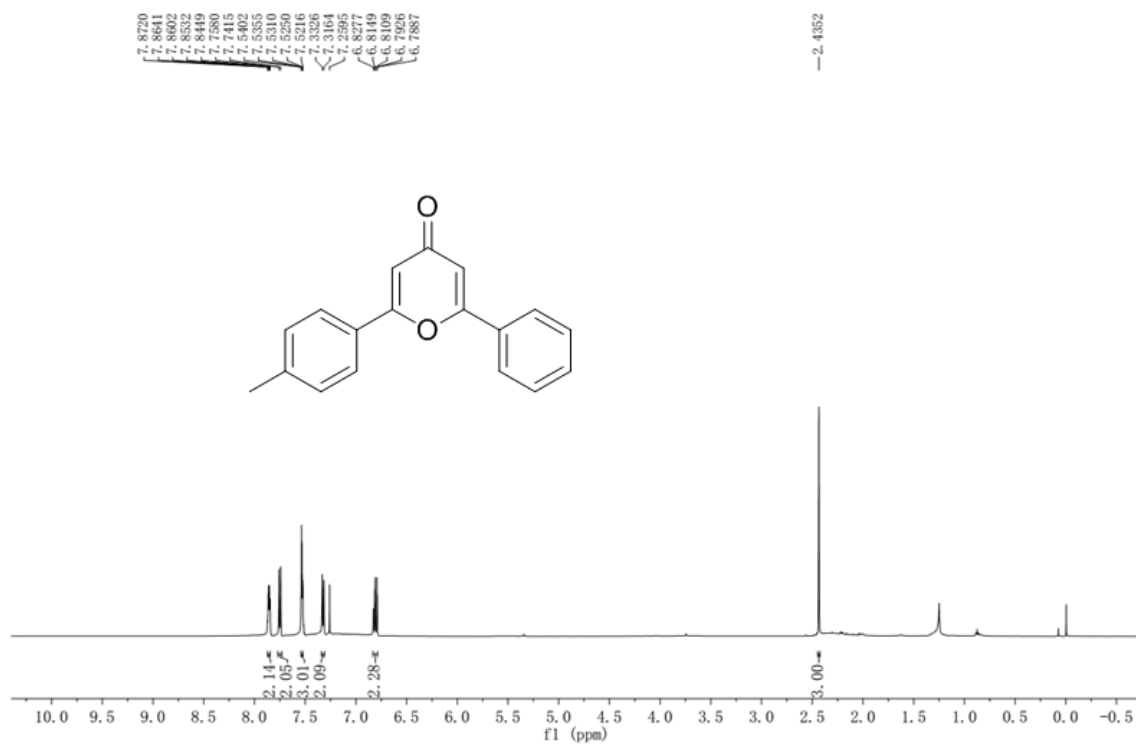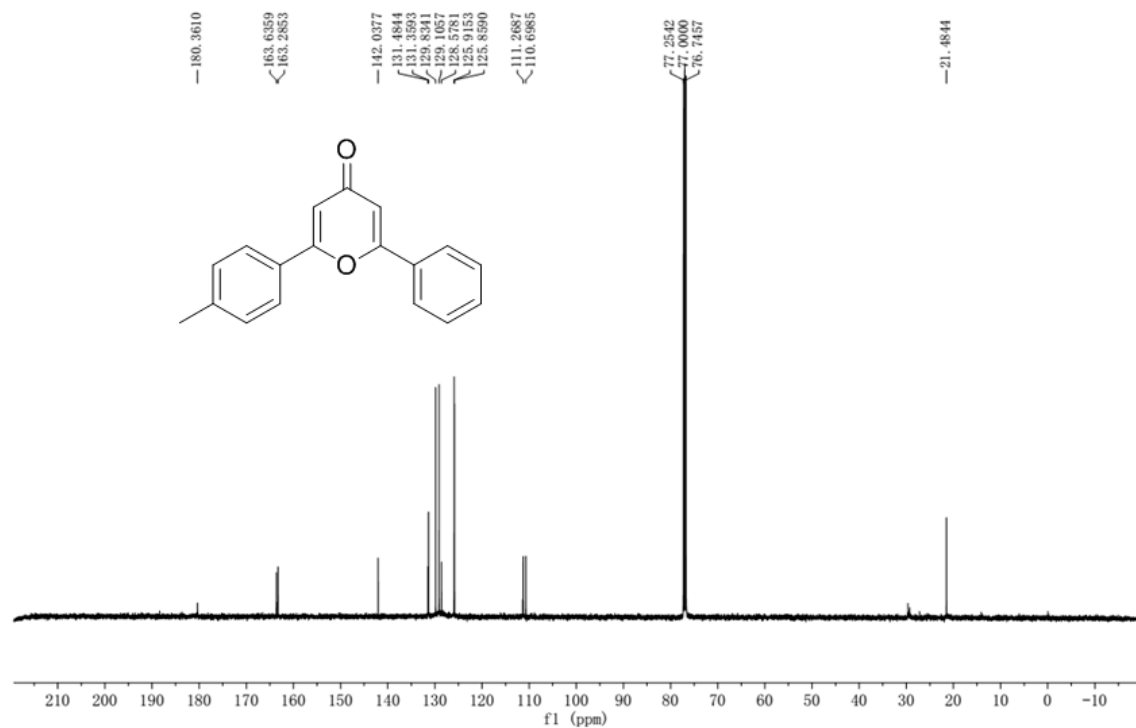

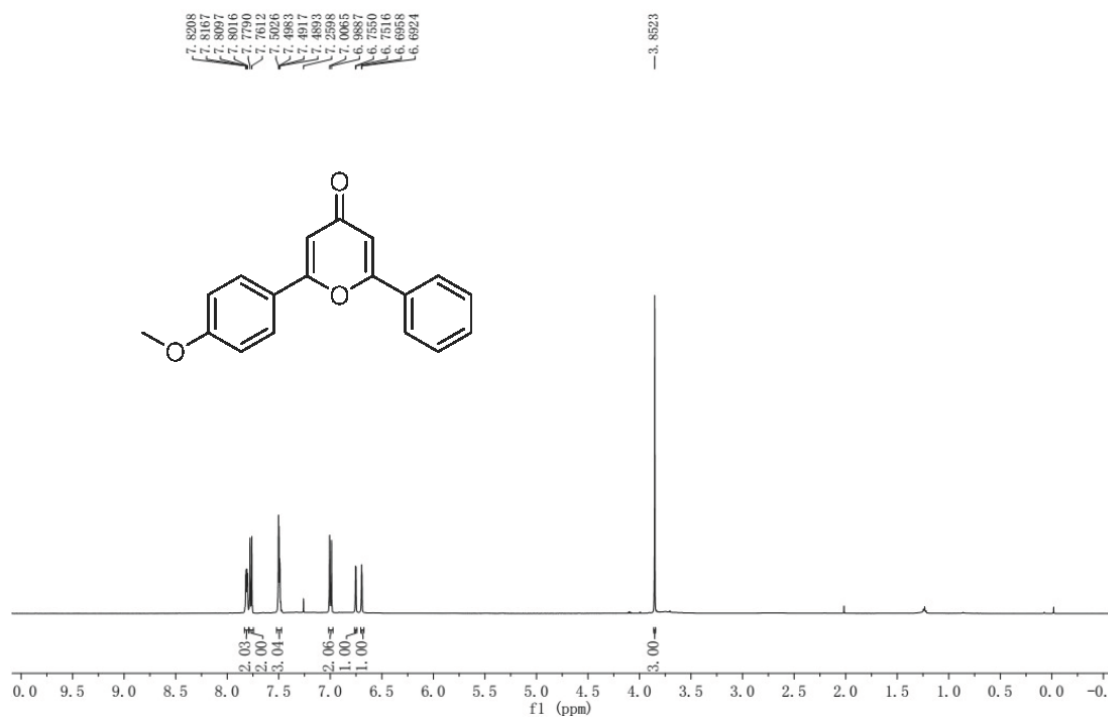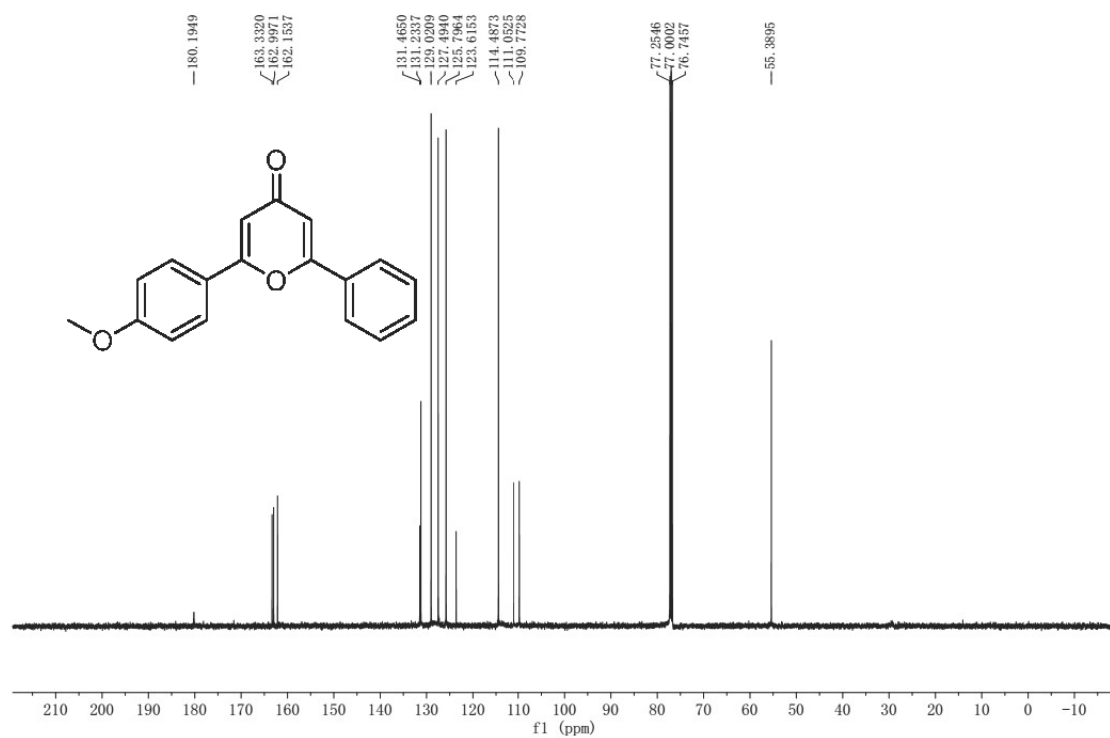

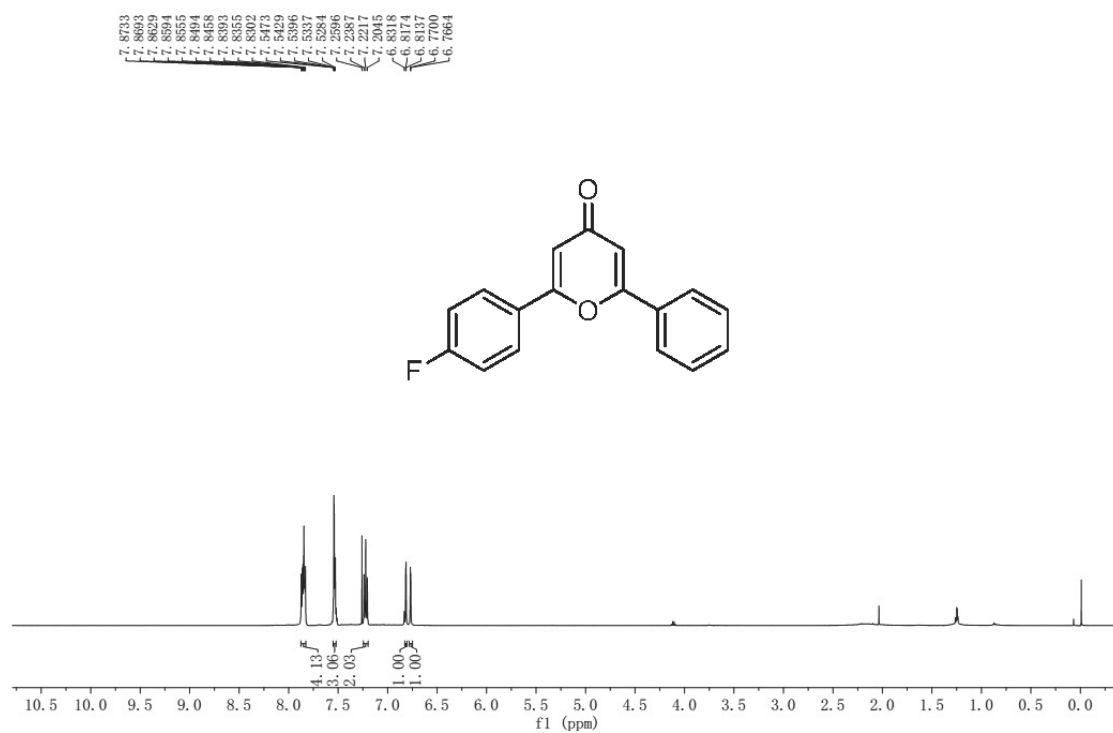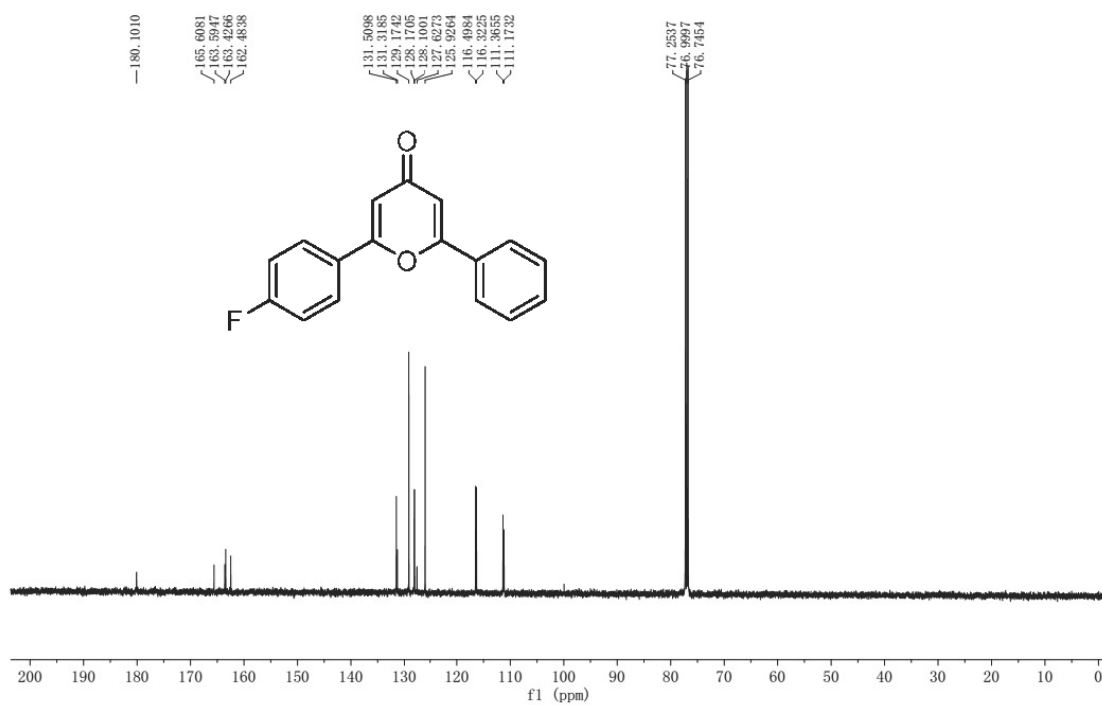



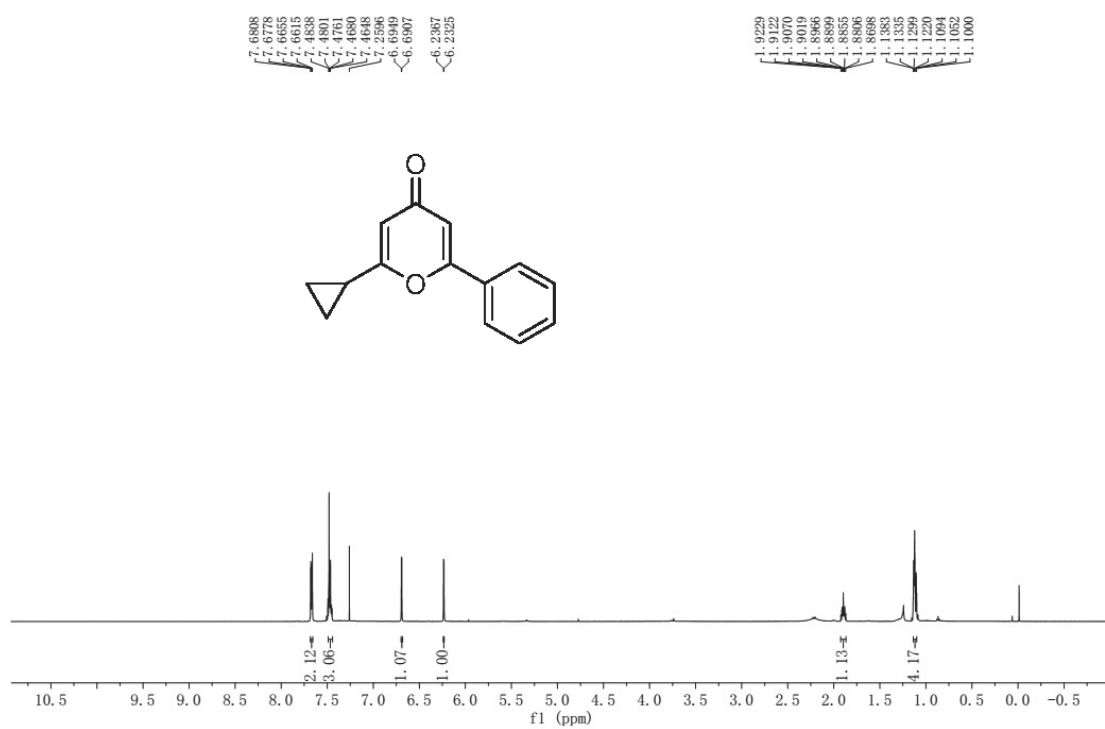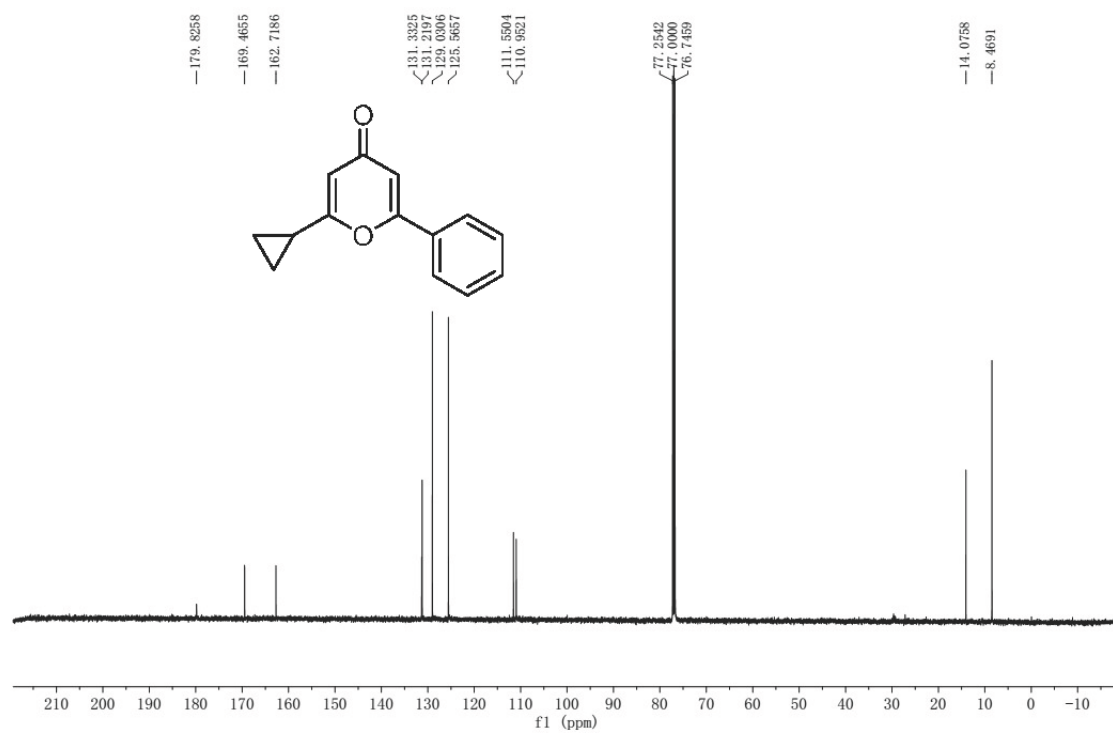

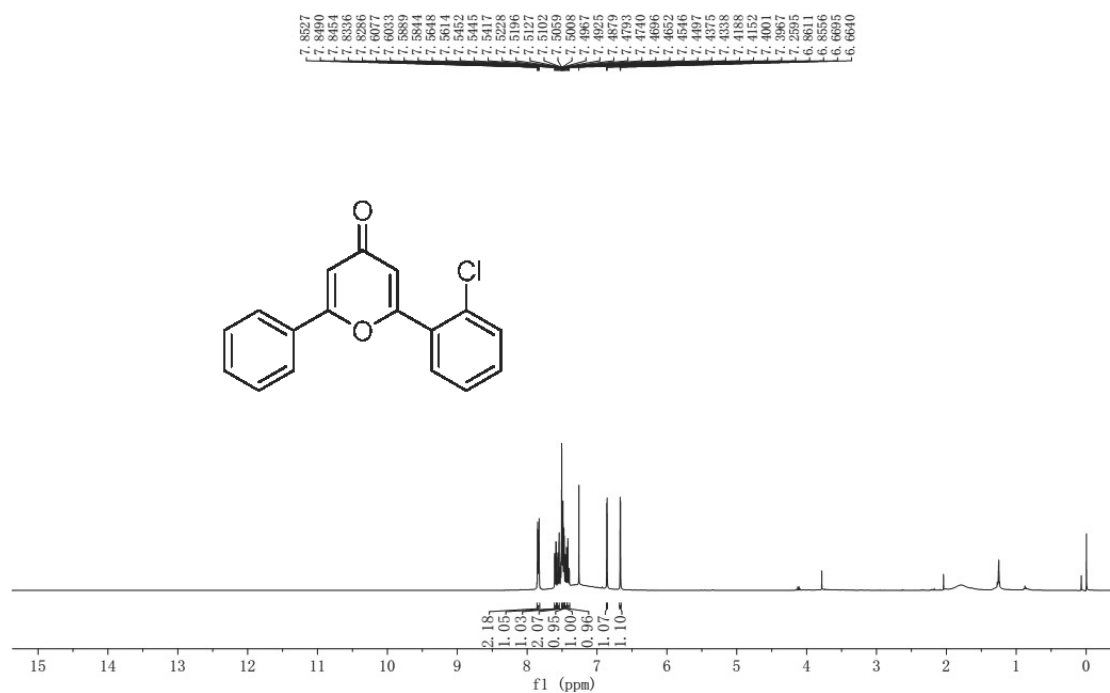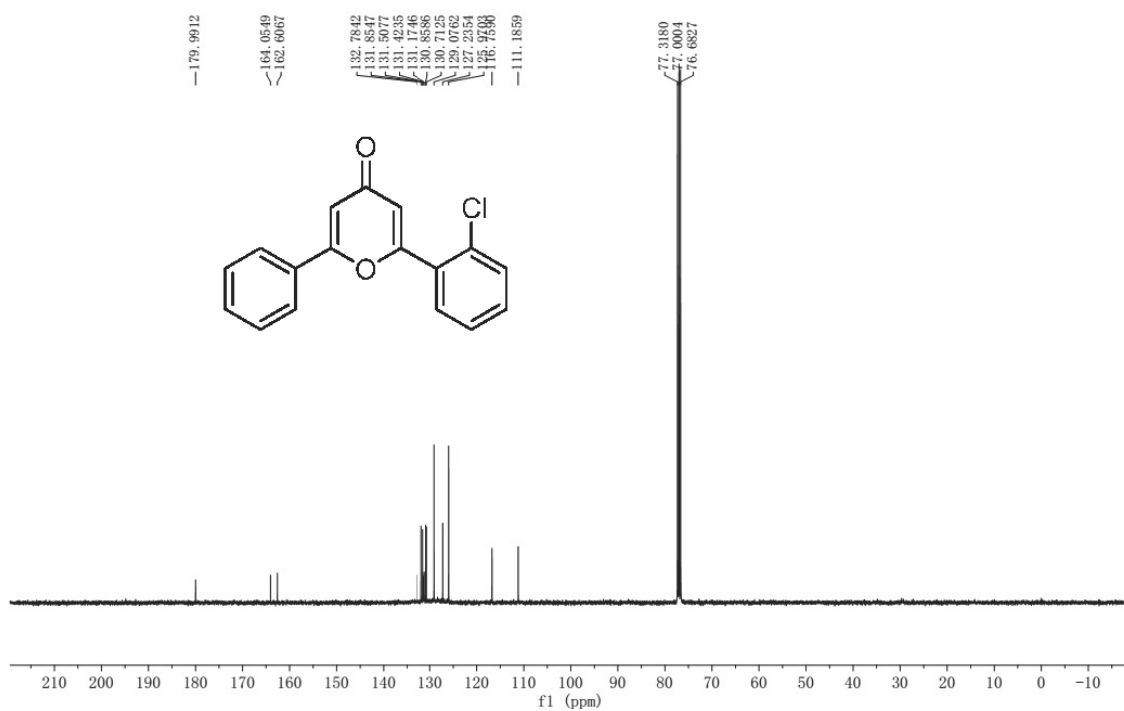

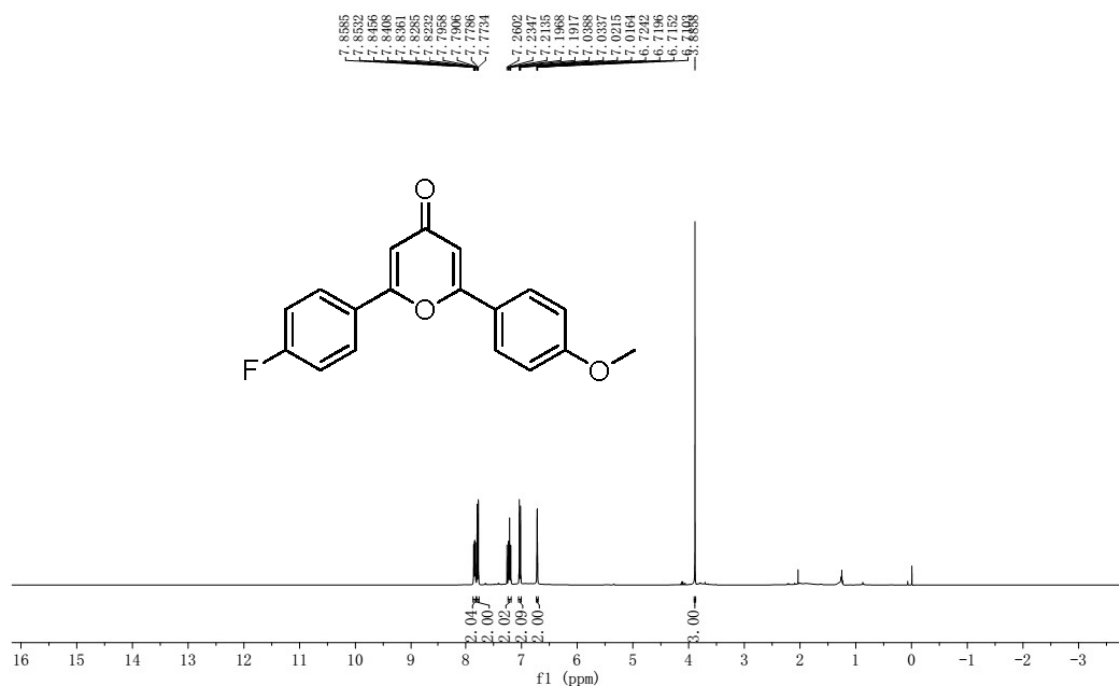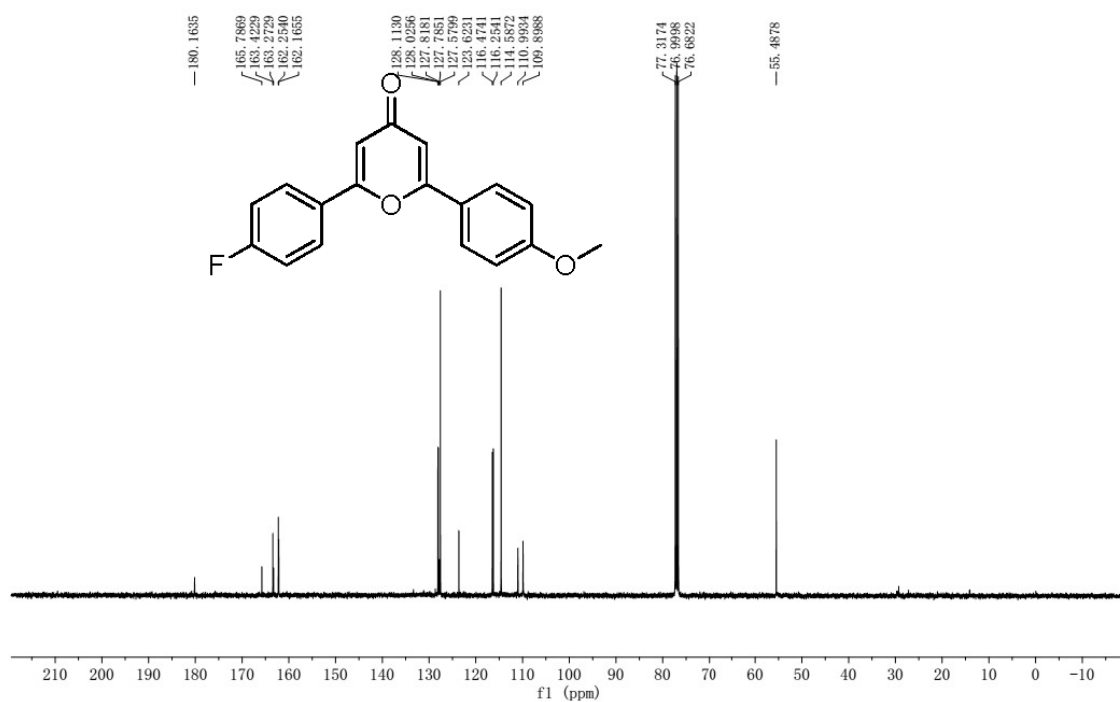

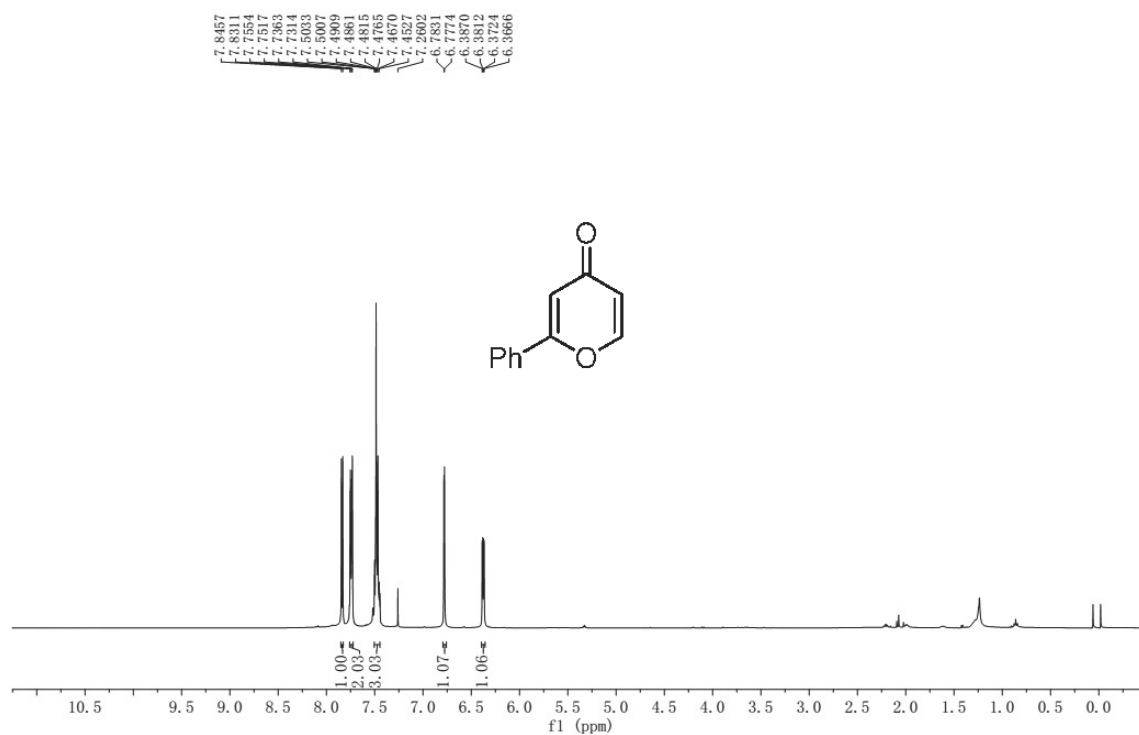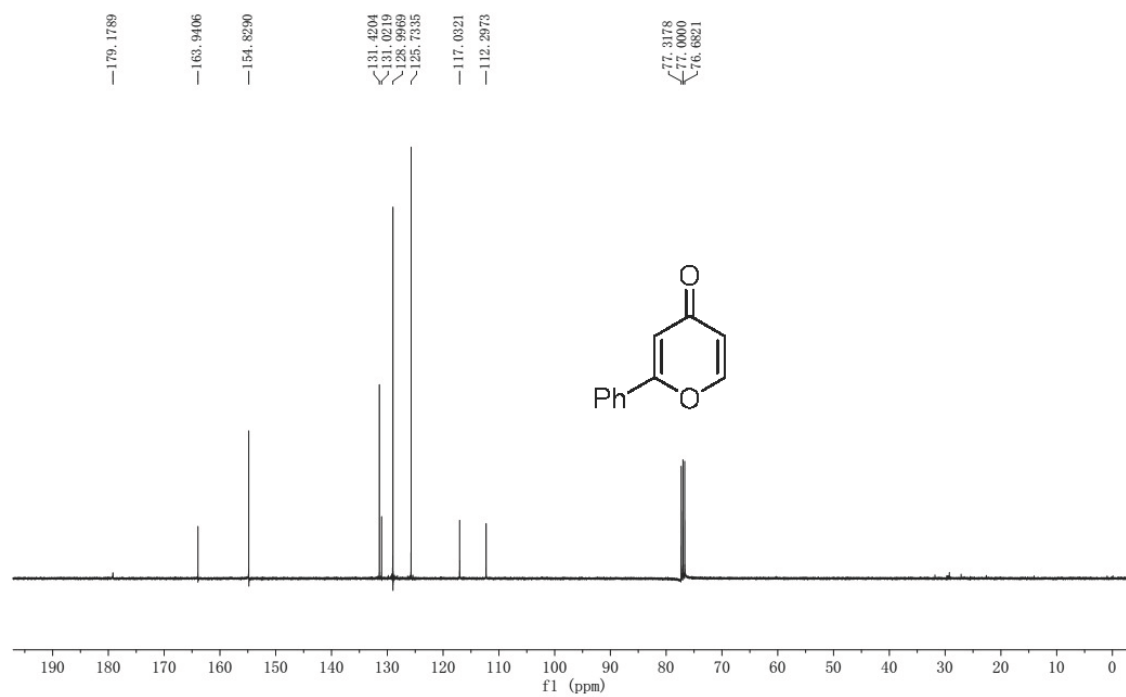

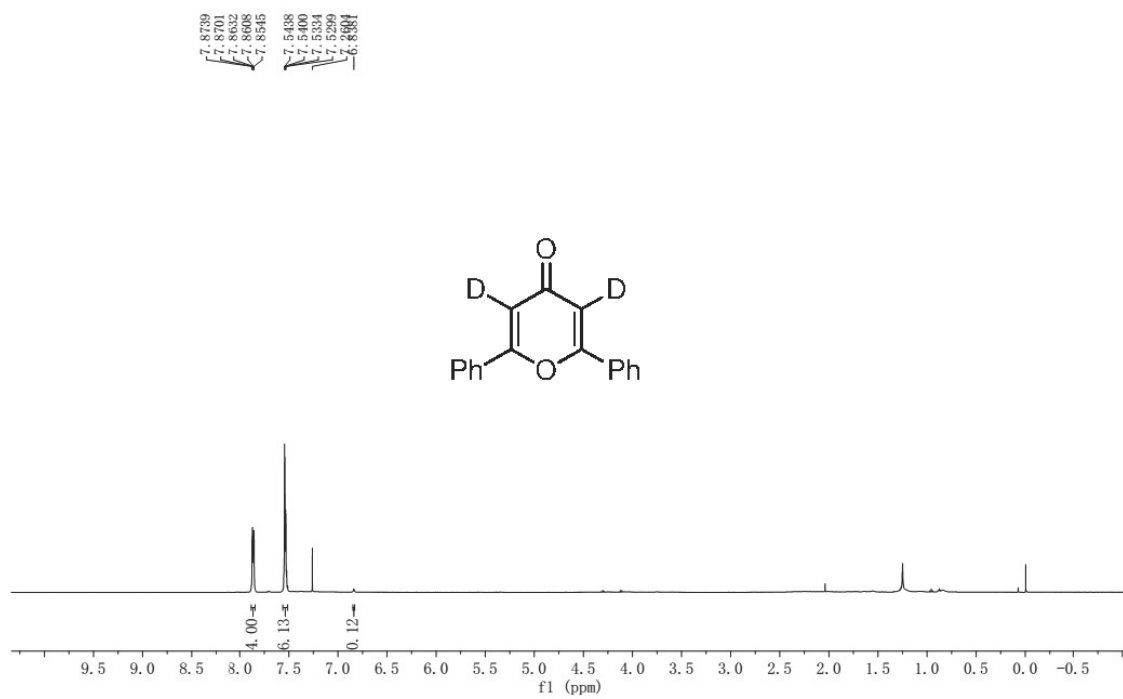

## 5. Copies of HRMS Spectra of Products

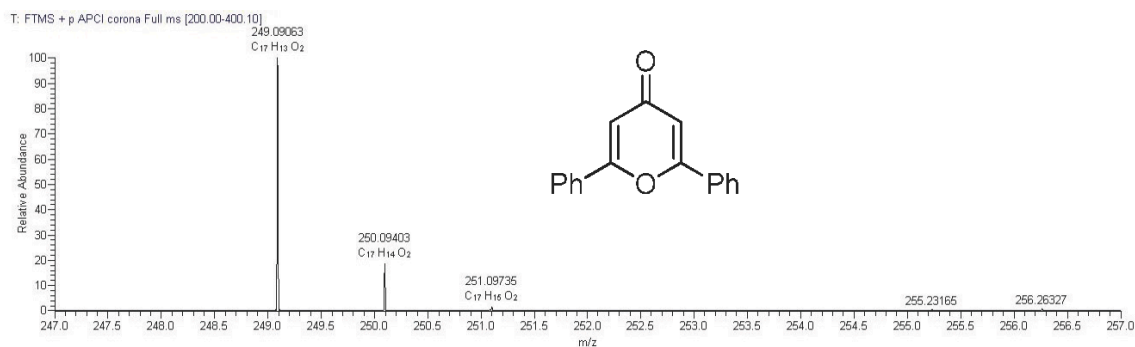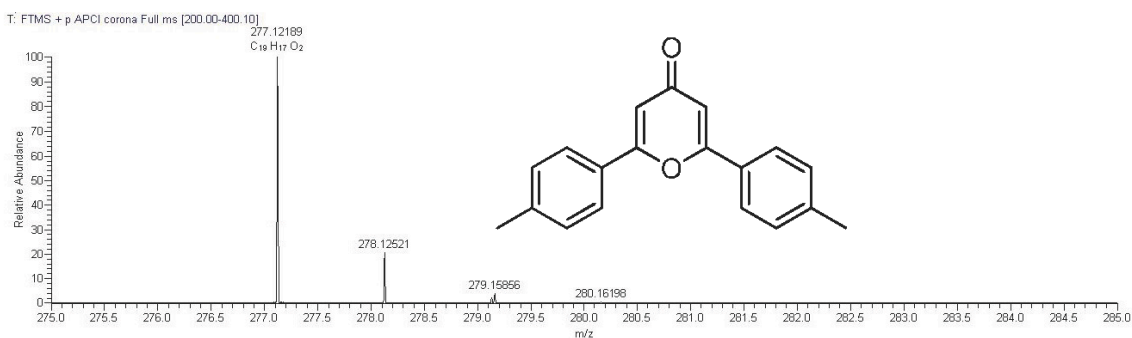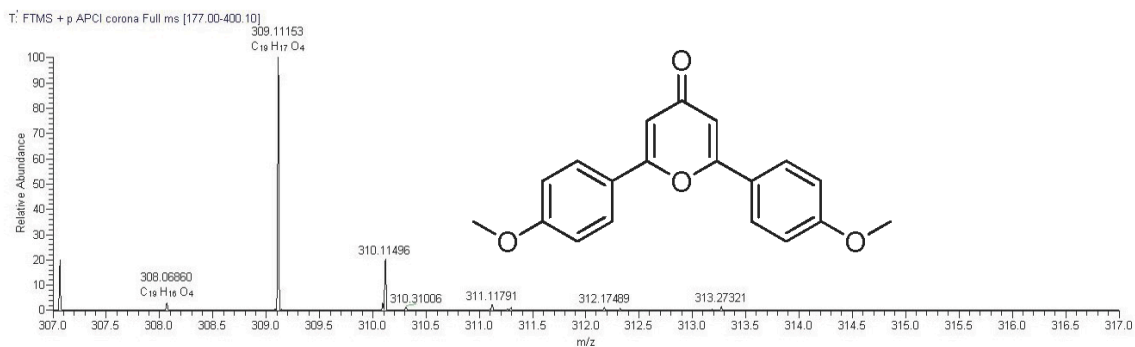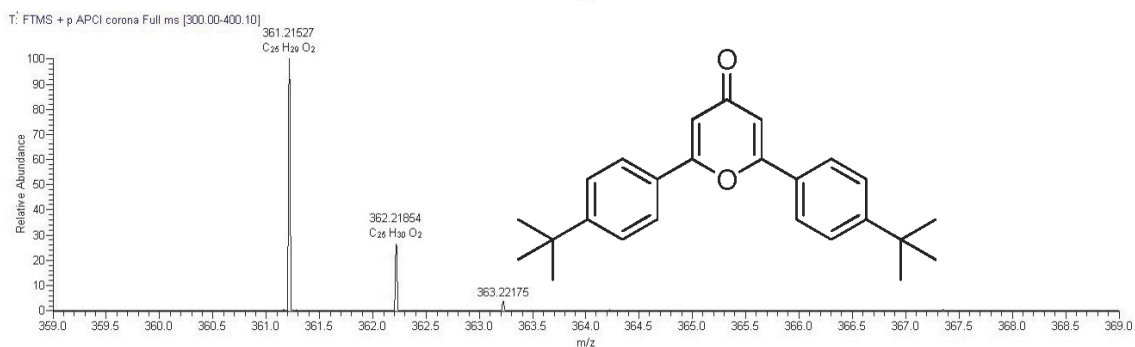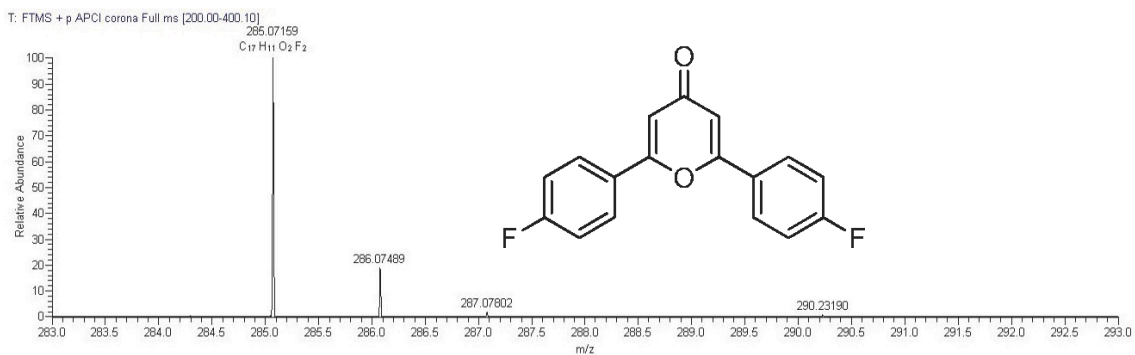

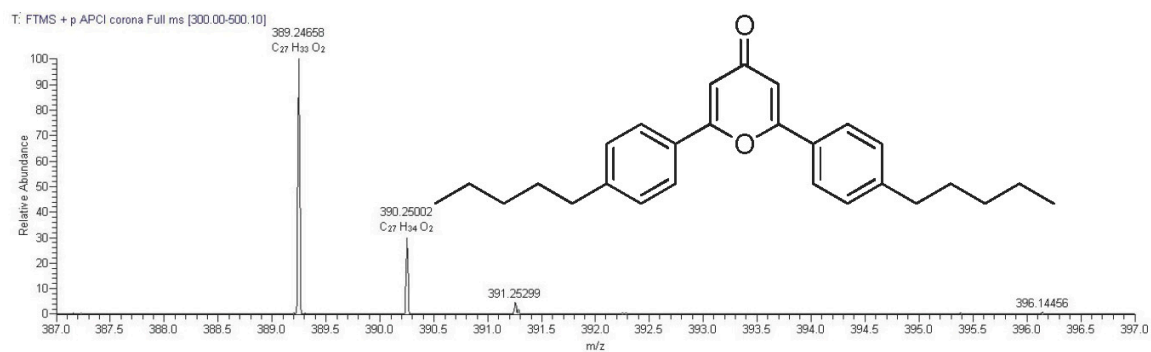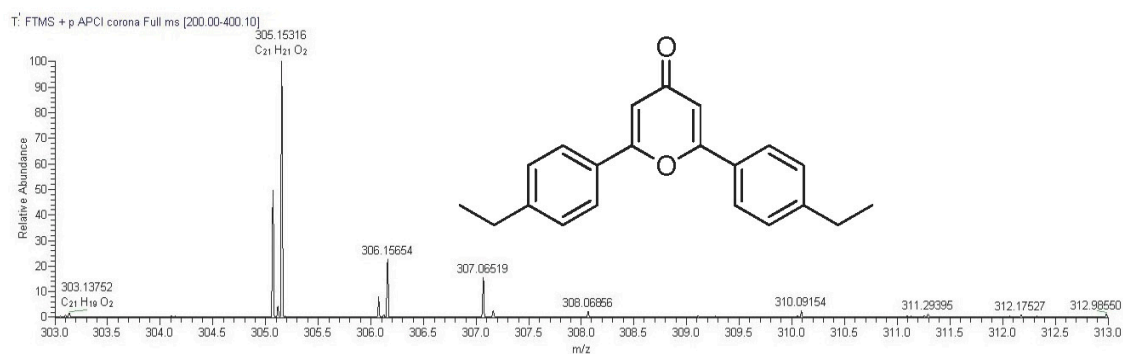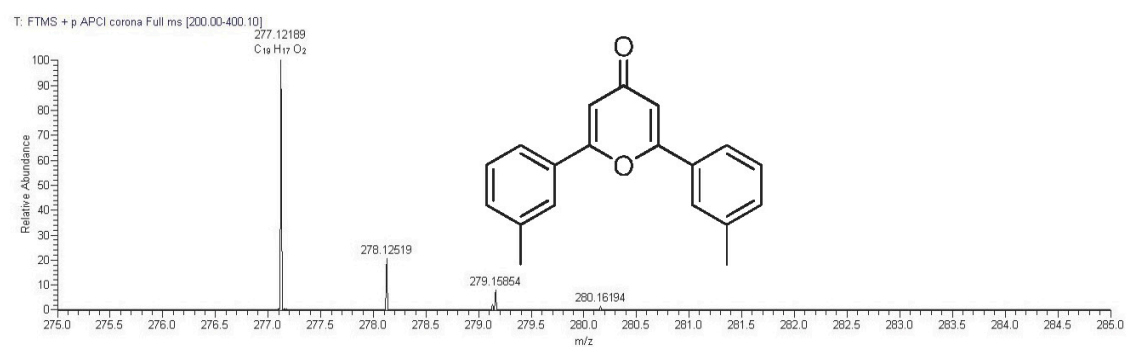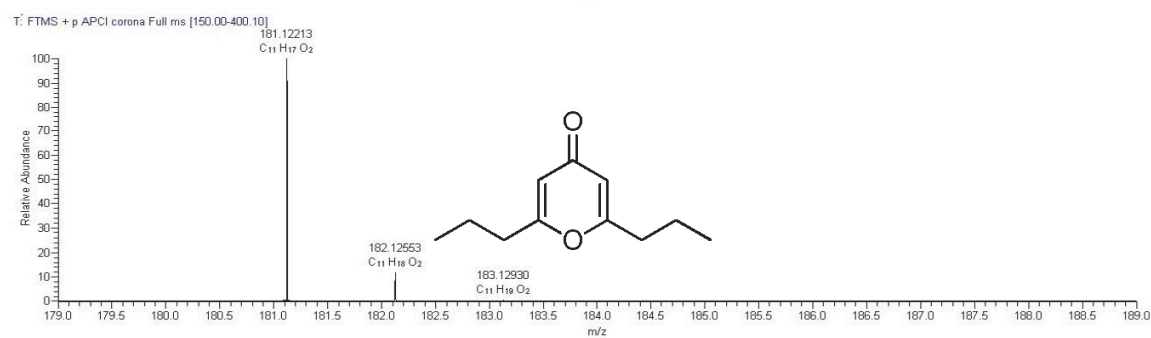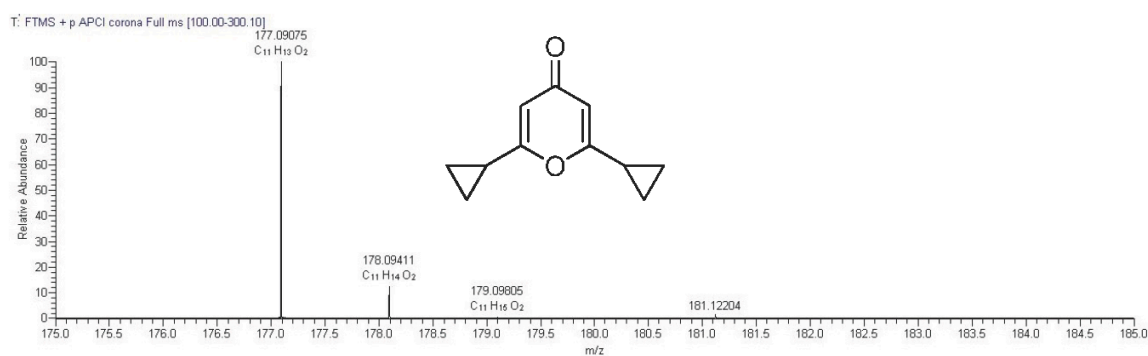

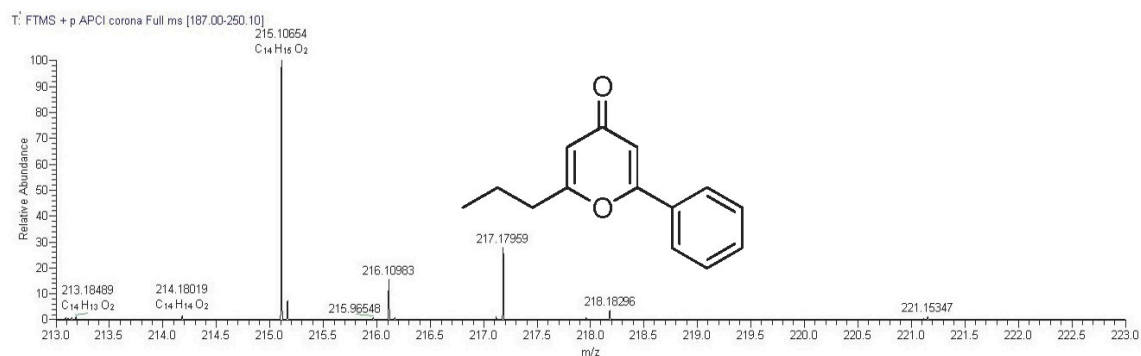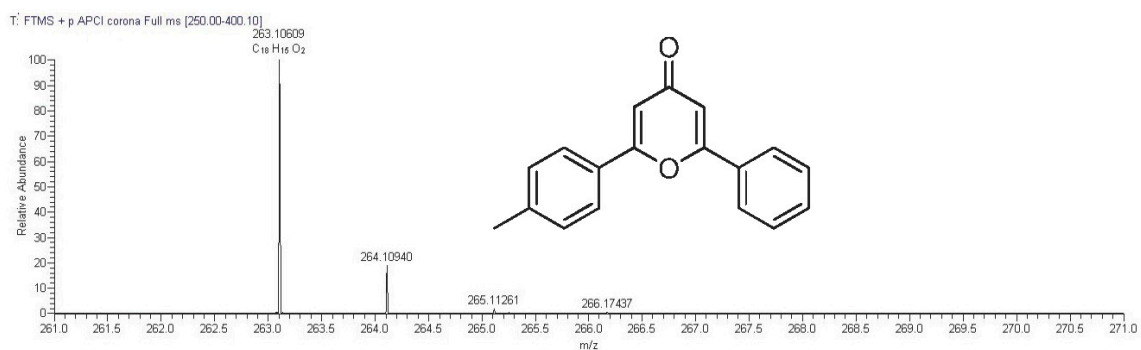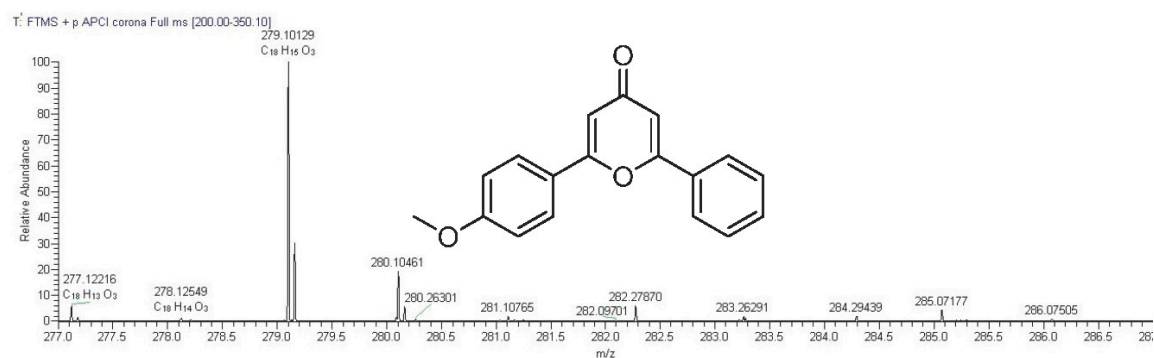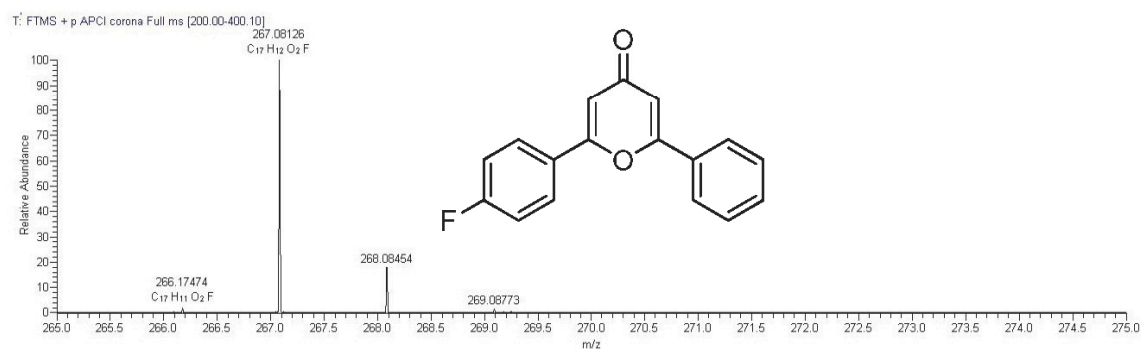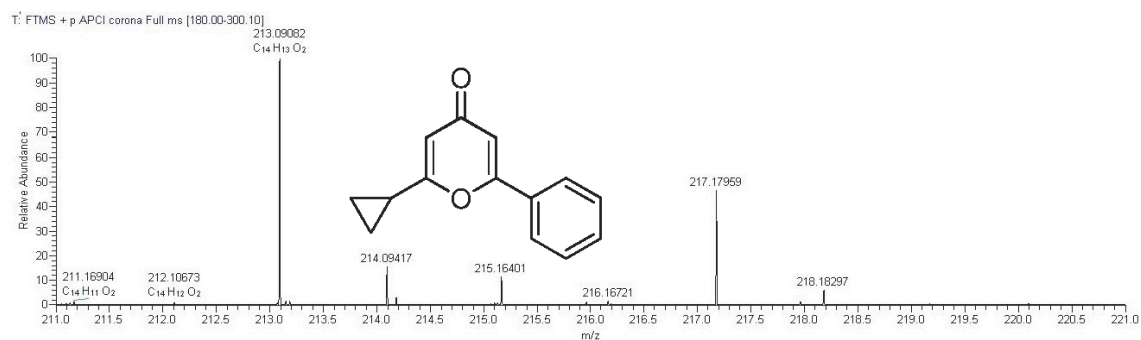



T: FTMS + p ESI Full ms [260.00-300.10]

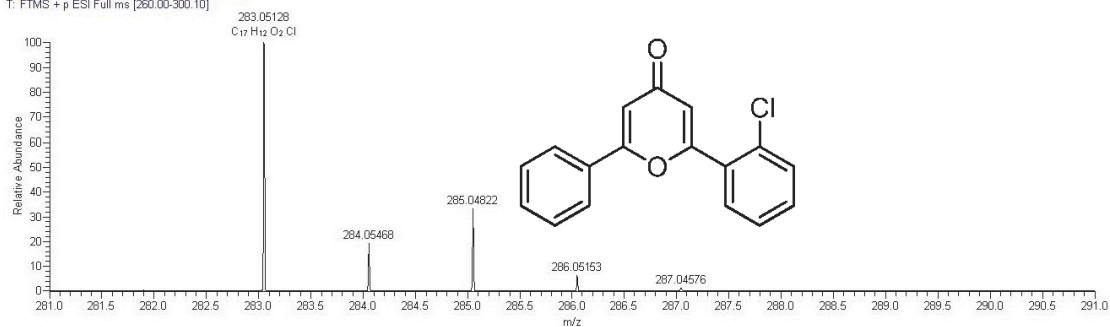

T: FTMS + p ESI Full ms [280.00-310.10]

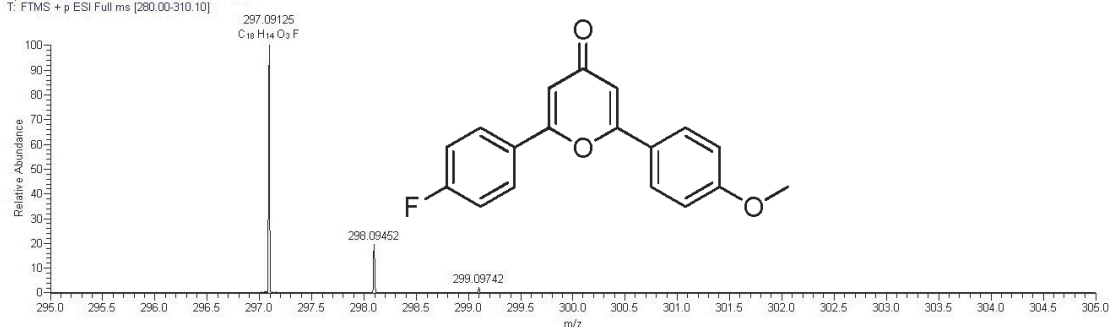TOH-100 #2-23 RT: 0.01-0.08 AV: 22 NL: 7.78E7  
T: FTMS + p ESI Full ms [150.00-200.10]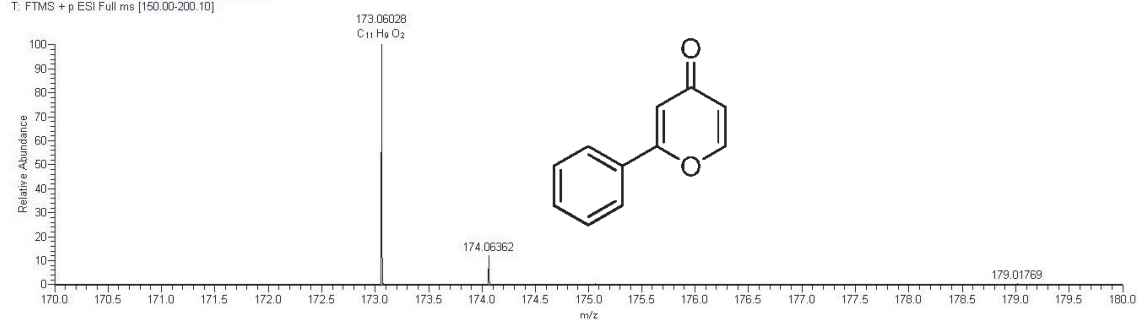

T: FTMS + p ESI Full ms [238.00-300.00]

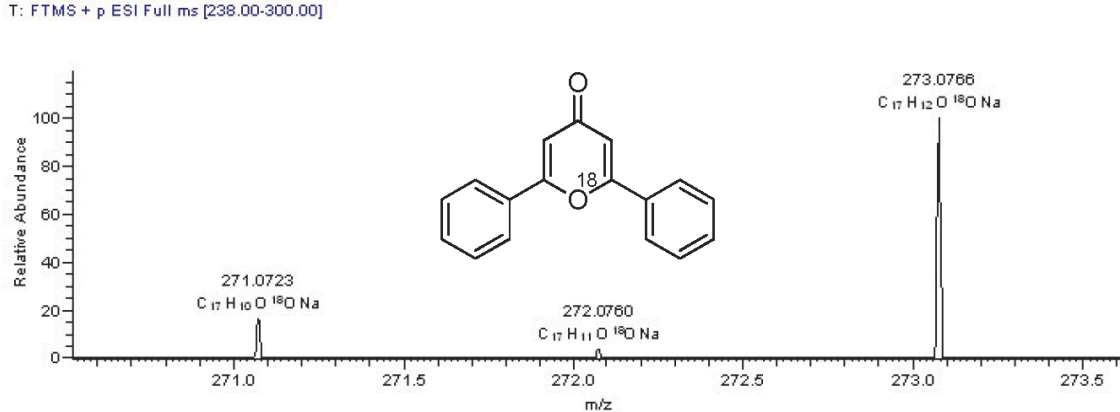

## References

- Qiu, Y.-F.; Yang, F.; Qiu, Z.-H.; Zhong, M.-J.; Wang, L.-J.; Ye, Y.-Y.; Song, B.; Liang, Y.-M. Brønsted Acid Catalyzed and NIS-Promoted Cyclization of Diynones: Selective Synthesis of 4-Pyrone, 4-Pyridone, and 3-Pyrrolone Derivatives. *J. Org. Chem.* **2013**, *78*, 12018–12028.
- Morisaki, Y.; Luu, T.; Tykwinski, R.R. A One-Pot Synthesis and Functionalization of Polyynes. *Org. Lett.* **2006**, *8*, 689–692.
